# Supplementary material for: Total synthesis of 14-membered ring β-resorcylic acid lactone (+)-monocillin II
Source: Royal Society of Chemistry journal article supplement (doi:10.1039/d4ob00110a), 2024-01-01
Supplement: d4ob00110a1.pdf [file d4ob00110a1.pdf]

Supporting Information

## **Total synthesis of 14-membered ring $\beta$ -resorcylic acid lactone (+)- monocillin II**

Naoki Kokaji, Naru Ishikura, Akinobu Matsuzawa, Shogo Kamo, and Kazuyuki Sugita\*

Department of Synthetic Medicinal Chemistry, Faculty of Pharmaceutical Sciences, Hoshi University, 2-4-41 Ebara,  
Shinagawa-ku, Tokyo 142-8501, Japan

### **Index**

|                                                                                         |    |
|-----------------------------------------------------------------------------------------|----|
| <b>1. General</b>                                                                       | 2  |
| <b>2. Experimental Procedures</b>                                                       | 2  |
| <b>3. Computational Details</b>                                                         | 7  |
| <b>4. <math>^1\text{H}</math> and <math>^{13}\text{C}</math> NMR spectroscopic data</b> | 11 |
| <b>5. References</b>                                                                    | 26 |

## 1. General

All reactions were carried out in a round-bottom flask or a test tube fitted with a 3-way glass stopcock under an Ar atmosphere unless otherwise stated. Reagents were purchased from commercial suppliers and used as received unless otherwise noted. All work-up and purification procedures were carried out with reagent-grade solvents under ambient atmosphere. Analytical thin layer chromatography (TLC) was performed on Merck precoated TLC plates (silica gel 60 F<sub>254</sub>, 0.25 mm). Flash chromatography was performed using silica gel CHROMATOREX PSQ60B (neutral, 60 μm; Fuji Silysia Chemical LTD.). Melting point (Mp) data were determined using a Yanaco MP apparatus and were uncorrected. Optical rotation was measured on JASCO P-2200. IR spectra were recorded on a JASCO FT/IR 4100 spectrometer. <sup>1</sup>H and <sup>13</sup>C NMR spectra were recorded on JEOL ECA-600 spectrometers. Chemical shift values are reported in δ (ppm) relative to residual solvent signals (CDCl<sub>3</sub> (0.03% TMS): 0.00 ppm or 7.26 ppm for <sup>1</sup>H and 77.00 ppm for <sup>13</sup>C, CD<sub>3</sub>OD: 3.30 ppm for <sup>1</sup>H and 49.0 ppm for <sup>13</sup>C). NMR data are reported as follows: chemical shifts, multiplicity (s: singlet, d: doublet, t: triplet, q: quartet, quin: quintet, m: multiplet, br: broad signal), coupling constant, and integration. High-resolution mass spectra (ESI-TOF) were measured on JEOL JMS-T100LP.

## 2. Experimental Procedures

### 2-(3,5-bis((*tert*-butyldiphenylsilyl)oxy)phenyl)-*N*-methoxy-*N*-methylacetamide (10)

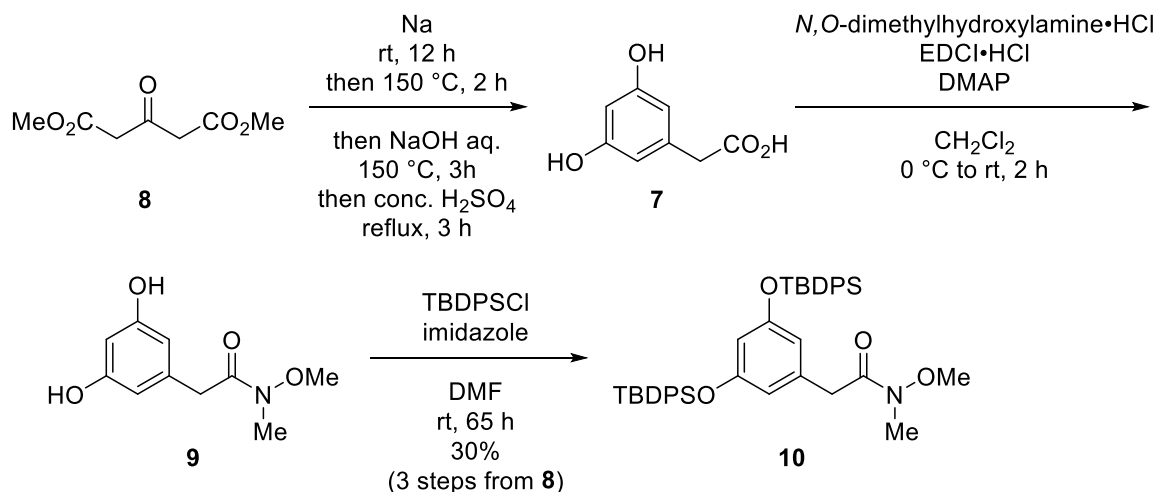

Compound 7 was prepared according to the literature procedure<sup>S1</sup>.

To a stirred dimethyl 1,3-acetonedicarboxylate (**8**, 6.0 mL, 41.7 mmol) was added sodium (75 mg, 3.26 mmol) at rt. After being stirred for 12 h at rt, the mixture was heated at 150 °C and stirred for further 2 h. The reaction mixture was cooled to rt and 12% NaOH aq. (38.5 mL) was added. The solution was heated at 150 °C (external temperature) under ambient atmosphere over 3 h. Then, conc. H<sub>2</sub>SO<sub>4</sub> was added to the residue at rt (Caution: Evolution of gas) and the mixture was refluxed for further 3 h. The mixture was cooled to rt and diluted with 1 M HCl aq. and EtOAc. The aqueous layer was extracted with EtOAc. The combined organic solution was washed with brine, dried over Na<sub>2</sub>SO<sub>4</sub>, filtered, and concentrated to give crude **7** as black oil, which was used next reaction without purification.

To a solution of crude **7** (prepared above) in CH<sub>2</sub>Cl<sub>2</sub> (29 mL) was added *N,O*-dimethylhydroxylamine

hydrochloride (2.25 g, 23.1 mmol), EDCI•HCl (5.51 g, 28.7 mmol), and DMAP (421 mg, 3.45 mmol) at 0 °C. The mixture was stirred for 2 h at rt. The reaction mixture was quenched by the addition of sat. NH<sub>4</sub>Cl aq. and diluted with EtOAc. The aqueous layer was extracted with EtOAc. The combined organic solution was washed with brine, dried over Na<sub>2</sub>SO<sub>4</sub>, filtered, and concentrated to give crude **9** as yellow solid, which was used next reaction without further purification.

To a solution of the crude amide **9** (prepared above) in DMF (15 mL) was added imidazole (2.07 g, 30.4 mmol) and TBDPSCl (4.1 mL, 16 mmol) at rt. After being stirred for 1 h, imidazole (1.00 g, 14.7 mmol) and TBDPSCl (2.0 mL, 7.8 mmol) was added to the mixture. The mixture was stirred for 64 h at rt. The reaction mixture was quenched by the addition of water and diluted with EtOAc. The aqueous layer was extracted with EtOAc. The combined organic solution was washed with brine, dried over Na<sub>2</sub>SO<sub>4</sub>, filtered, and concentrated to give a residue. The residue was purified by flash column chromatography (hexane/EtOAc = 2/1) to give **10** (4.25 g, 6.18 mmol, 30% over 3 steps) as a colorless oil.

IR (neat)  $\nu_{\max}$  = 3071, 3050, 2958, 2934, 2894, 2859, 1668, 1591, 1454, 1429, 1340, 1169, 1113, 1037, 704 cm<sup>-1</sup>; <sup>1</sup>H NMR (600 MHz, CDCl<sub>3</sub>)  $\delta$  17.53 (dd,  $J$  = 7.2, 12. Hz, 8H), 7.37-7.34 (m, 4H), 7.27-7.24 (m, 8H), 6.31 (br s, 2H), 6.06 (br s, 1H), 3.42 (br s, 2H), 3.19 (br s, 3H), 3.04 (br s, 3H), 0.98 (s, 18H); <sup>13</sup>C NMR (150 MHz, CDCl<sub>3</sub>)  $\delta$  172.0, 156.1 (2C), 136.5, 135.4 (8C), 132.7 (4C), 129.6 (4C), 127.5 (8C), 113.9 (2C), 110.0, 60.9, 39.4, 32.0, 26.5 (6C), 19.3 (2C), ; HRMS (ESI)  $m/z$  calcd. for C<sub>42</sub>H<sub>50</sub>NO<sub>4</sub>Si<sub>2</sub> ([M+H]<sup>+</sup>) 688.3273, found 688.3287.

### 1-(3,5-bis((*tert*-butyldiphenylsilyloxy)phenyl)oct-7-en-3-yn-2-one (**11**))

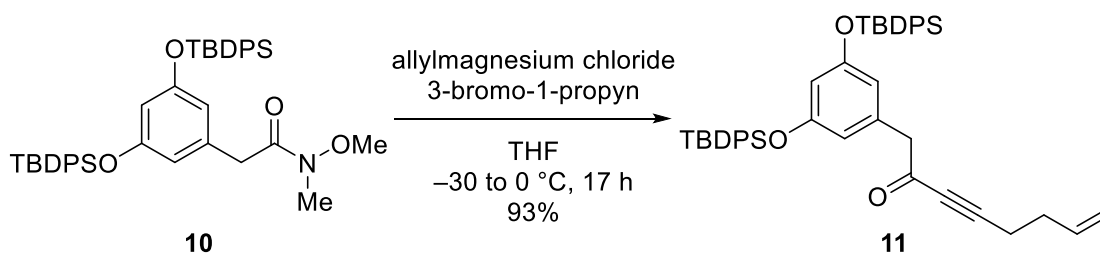

To a solution of 3-bromo-1-propyn (427  $\mu$ L, 4.95 mmol) in THF (5.0 mL) was added allylmagnesium chloride (2 M in THF, 4.95 mL, 9.90 mmol) at 0 °C. The mixture was stirred for 5 h at 30 °C and then cooled to -30 °C. To the solution was added a solution of **10** (1.70 g, 2.47 mmol) in THF (20 mL) dropwise via syringe over 30 min. at -30 °C and the resulting mixture was stirred for further 15 h at 0 °C. The reaction mixture was quenched by the addition of sat. NH<sub>4</sub>Cl aq. and diluted with EtOAc. The aqueous layer was extracted with EtOAc. The combined organic solution was washed with brine, dried over Na<sub>2</sub>SO<sub>4</sub>, filtered, and concentrated to give a residue. The residue was purified by flash column chromatography (hexane/EtOAc = 97/3 to 9/1) to give **11** (1.63 g, 2.31 mmol, 93%) as a colorless oil.

IR (neat)  $\nu_{\max}$  = 3072, 3051, 2957, 2934, 2895, 2859, 2213, 1675, 1590, 1453, 1340, 1172, 1112, 1038, 703 cm<sup>-1</sup>; <sup>1</sup>H NMR (600 MHz, CDCl<sub>3</sub>)  $\delta$  7.60 (d,  $J$  = 7.2 Hz, 8H), 7.42 (dd,  $J$  = 7.8, 7.2 Hz, 4H), 7.32 (dd,  $J$  = 7.8, 7.2 Hz, 8H), 6.39 (s, 2H), 6.17 (s, 1H), 5.84-5.78 (m, 1H), 5.13-5.09 (m, 2H), 3.54 (s, 2H), 2.35 (t,  $J$  = 7.2 Hz, 2H), 2.27 (dd,  $J$  = 13.8, 7.2 Hz, 2H), 1.07 (s, 18H); <sup>13</sup>C NMR (150 MHz, CDCl<sub>3</sub>)  $\delta$  184.7, 156.2 (2C), 135.7, 135.3 (8C), 134.5, 132.6 (4C), 129.6 (4C), 127.5 (8C), 116.3, 114.6 (2C), 110.4, 94.9, 80.8, 77.2, 51.9, 31.6, 26.4 (6C), 19.3 (2C), 18.6; HRMS (ESI)  $m/z$  calcd. for C<sub>46</sub>H<sub>51</sub>O<sub>3</sub>Si<sub>2</sub> ([M+H]<sup>+</sup>) 707.3371, found 707.3385.

## 2,4-bis((*tert*-butyldiphenylsilyl)oxy)-6-(2-oxooct-7-en-3-yn-1-yl)benzaldehyde (**12**)

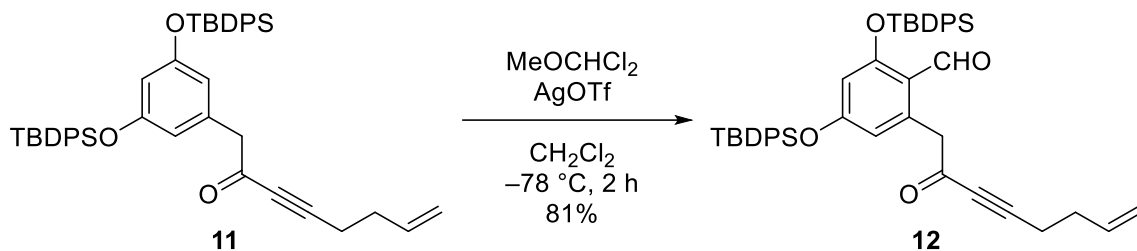

To a solution of **11** (140.0 mg, 198  $\mu$ mol) in CH<sub>2</sub>Cl<sub>2</sub> (8 mL) was added AgOTf (210.4 mg, 819  $\mu$ mol) at -78 °C. To the mixture was added a solution of dichloromethyl methyl ether (MeOCHCl<sub>2</sub>, 35.9  $\mu$ L, 397  $\mu$ mol) CH<sub>2</sub>Cl<sub>2</sub> (2 mL) dropwise via syringe at -78 °C. The mixture was stirred for 2 h at the same temperature. The reaction mixture was quenched by the addition of sat. NaHCO<sub>3</sub> aq. and diluted with CH<sub>2</sub>Cl<sub>2</sub>. The aqueous layer was extracted with CH<sub>2</sub>Cl<sub>2</sub>. The combined organic solution was washed with brine, dried over Na<sub>2</sub>SO<sub>4</sub>, filtered, and concentrated to give a residue. The residue was purified by flash column chromatography (hexane/EtOAc = 49/1 to 4/1) to give **12** (118.2 mg, 161  $\mu$ mol, 81%) as a colorless oil.

IR (neat)  $\nu_{\text{max}}$  = 3072, 2956, 2933, 2894, 2859, 2216, 1679, 1595, 1565, 1430, 1341, 1164, 1113, 744, 702 cm<sup>-1</sup>; <sup>1</sup>H NMR (600 MHz, CDCl<sub>3</sub>)  $\delta$  10.68 (s, 1H), 7.46 (d,  $J$  = 7.8 Hz, 4H), 7.38-7.33 (m, 8H), 7.24 (dd,  $J$  = 7.8, 7.2 Hz, 4H), 7.19 (dd,  $J$  = 7.8, 7.2 Hz, 4H), 6.22 (br s, 1H), 5.93 (d,  $J$  = 1.8 Hz, 1H), 5.87-5.80 (m, 1H), 5.10 (dd,  $J$  = 16.8, 1.8 Hz, 1H), 5.07 (d,  $J$  = 10.2 Hz, 1H), 4.06 (s, 2H), 2.44 (t,  $J$  = 6.6 Hz, 2H), 2.31 (dd,  $J$  = 13.8, 6.6 Hz, 2H), 0.99 (s, 9H), 0.89 (s, 9H); <sup>13</sup>C NMR (150 MHz, CDCl<sub>3</sub>)  $\delta$  190.1, 183.9, 161.8, 160.5, 137.7, 135.9, 135.1 (4C), 135.0 (4C), 131.5 (2C), 131.1 (2C), 130.0 (2C), 129.8 (2C), 127.8 (4C), 127.7 (4C), 119.3, 118.4, 116.2, 110.3, 93.0, 81.1, 50.4, 31.7, 26.4 (3C), 26.2 (3C), 19.5, 19.2, 18.8; HRMS (ESI)  $m/z$  calcd. for C<sub>47</sub>H<sub>50</sub>O<sub>4</sub>Si<sub>2</sub>Na ([M+Na]<sup>+</sup>) 757.3140, found 757.3155.

## 2,4-bis((*tert*-butyldiphenylsilyl)oxy)-6-(2-oxooct-7-en-3-yn-1-yl)benzoic acid (**13**)

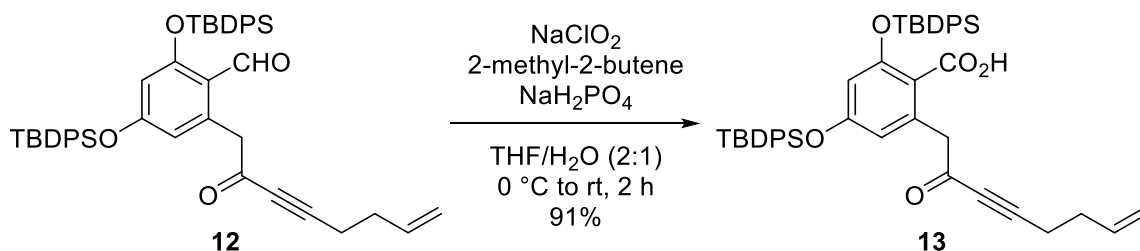

To a suspension of **12** (245.8 mg, 334  $\mu$ mol), 2-methyl-2-butene (1.7 mL, 16.0 mmol), and NaH<sub>2</sub>PO<sub>4</sub> (401.8 mg, 3.35 mmol) in THF (3.3 mL) was added a solution of NaClO<sub>2</sub> (303.5 mg, 3.36 mmol) in H<sub>2</sub>O (1.7 mL) at 0 °C. The mixture was stirred for 2 h at rt. The reaction mixture was quenched by the addition of water and diluted with EtOAc. The aqueous layer was extracted with EtOAc. The combined organic solution was washed with brine, dried over Na<sub>2</sub>SO<sub>4</sub>, filtered, and concentrated to give a residue. The residue was purified by flash column chromatography (hexane/EtOAc = 9/1 to 7/3) to give **13** (228.1 mg, 304  $\mu$ mol, 91%) as a colorless oil.

IR (neat)  $\nu_{\text{max}}$  = 3072, 3051, 3017, 2955, 2934, 2896, 2860, 2215, 1689, 1597, 1430, 1348, 1179, 1113, 846, 745, 703 cm<sup>-1</sup>; <sup>1</sup>H NMR (600 MHz, CDCl<sub>3</sub>)  $\delta$  10.70 (br s, 1H), 7.49 (d,  $J$  = 6.6 Hz, 4H), 7.39 (dd,  $J$  = 7.2, 7.8 Hz, 2H), 7.34 (dd,  $J$  = 7.8, 6.6 Hz, 2H), 7.29-7.25 (m, 8H), 7.17 (dd,  $J$  = 7.8, 7.2 Hz, 4H), 6.23 (d,  $J$  = 1.8 Hz, 1H), 6.00 (d,  $J$  = 1.8 Hz, 1H), 5.84-5.80 (m, 1H), 5.09 (dd,  $J$  = 16.8, 1.8 Hz, 1H), 5.07 (dd,  $J$  = 10.2, 1.8 Hz, 1H), 4.02 (d,  $J$  = 2.4

Hz, 2H), 2.41 (t,  $J = 7.8$  Hz, 2H), 2.28 (dd,  $J = 13.8, 7.8$  Hz, 2H), 0.99 (s, 9H), 0.84 (s, 9H);  $^{13}\text{C}$  NMR (150 MHz,  $\text{CDCl}_3$ )  $\delta$  184.1, 169.2, 157.9, 155.8, 137.3, 135.9, 135.2 (4C), 135.0 (4C), 131.7 (2C), 130.8 (2C), 130.1 (2C), 129.8 (2C), 127.8 (4C), 127.6 (4C), 117.8, 116.2, 115.2, 110.5, 94.2, 80.7, 50.9, 31.6, 26.2 (3C), 26.1 (3C), 19.23, 19.17, 18.7; HRMS (ESI)  $m/z$  calcd. for  $\text{C}_{47}\text{H}_{50}\text{O}_5\text{Si}_2\text{Na}$  ( $[\text{M}+\text{Na}]^+$ ) 773.3088, found 773.3105.

**(*R*)-pent-4-en-2-yl 2,4-bis((*tert*-butyldiphenylsilyl)oxy)-6-(2-oxooct-7-en-3-yn-1-yl)benzoate (**15**)**

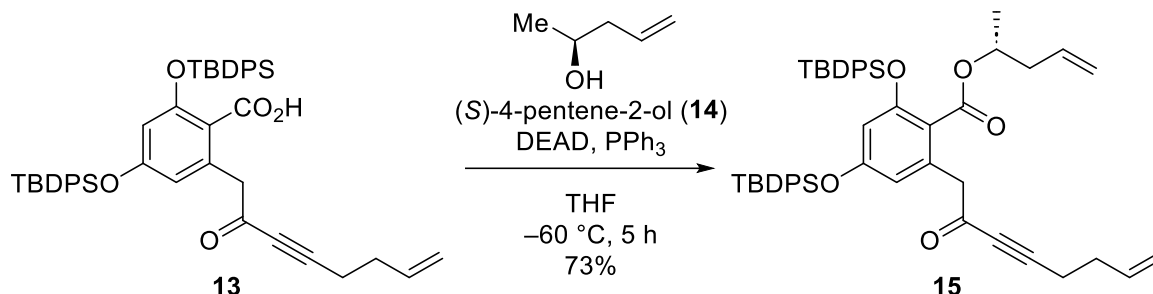

To a suspension of  $\text{PPh}_3$  (175.0 mg, 667  $\mu\text{mol}$ ) in THF (1.0 mL) was added DEAD (40% in toluene, 306  $\mu\text{L}$ , 667  $\mu\text{mol}$ ) at 0  $^\circ\text{C}$ . The mixture was stirred for 30 min. at rt and then cooled to  $-60$   $^\circ\text{C}$ . To the mixture was added a solution of **13** (50.0 mg, 66.6  $\mu\text{mol}$ ) and (*S*)-4-pentene-2-ol (**14**, 10.3  $\mu\text{L}$ , 100  $\mu\text{mol}$ ) in THF (0.3 mL) dropwise via syringe at  $-60$   $^\circ\text{C}$ . The solution was stirred for 5 h at the same temperature. The reaction mixture was quenched by the addition of sat.  $\text{NaHCO}_3$  aq. and diluted with EtOAc. The aqueous layer was extracted with EtOAc. The combined organic solution was washed with brine, dried over  $\text{Na}_2\text{SO}_4$ , filtered, and concentrated to give a residue. The residue was purified by flash column chromatography (hexane/EtOAc = 97/3 to 9/1) to give **15** (39.9 mg, 48.7  $\mu\text{mol}$ , 73%) as a colorless oil.

$[\alpha]_{\text{D}}^{27} -6.75$  ( $c$  1.50,  $\text{CHCl}_3$ ); IR (neat)  $\nu_{\text{max}} = 3073, 2955, 2934, 2895, 2859, 2214, 1725, 1675, 1596, 1471, 1427, 1348, 1260, 1177, 1113, 703$   $\text{cm}^{-1}$ ;  $^1\text{H}$  NMR (600 MHz,  $\text{CDCl}_3$ )  $\delta$  7.50 (dd,  $J = 7.8, 1.8$  Hz, 4H), 7.35-7.29 (m, 8H), 7.23 (d,  $J = 7.2$  Hz, 2H), 7.21 (d,  $J = 7.8$  Hz, 2H), 7.17 (d,  $J = 7.2$  Hz, 2H), 7.15 (d,  $J = 7.8$  Hz, 2H), 6.23 (d,  $J = 1.2$  Hz, 1H), 5.88 (d,  $J = 1.2$  Hz, 1H), 5.82-5.73 (m, 2H), 5.15-5.01 (m, 5H), 3.67 (d,  $J = 1.8$  Hz, 2H), 2.52-2.48 (m, 1H), 2.37-2.31 (m, 3H), 2.23 (dd,  $J = 13.8, 7.8$  Hz, 2H), 1.33 (d,  $J = 6.0$  Hz, 3H), 0.95 (s, 9H), 0.85 (s, 9H);  $^{13}\text{C}$  NMR (150 MHz,  $\text{CDCl}_3$ )  $\delta$  184.1, 166.8, 156.4, 154.0, 135.8, 135.3 (2C), 135.2 (2C), 135.1 (4C), 135.0, 133.7, 132.7, 132.1 (2C), 131.9, 131.8, 129.6 (4C), 127.6 (4C), 127.5 (4C), 120.1, 117.9, 116.3, 115.5, 110.0, 95.2, 80.7, 71.5, 49.7, 40.2, 31.6, 26.3 (6C), 19.3 (2C), 18.7; HRMS (ESI)  $m/z$  calcd. for  $\text{C}_{52}\text{H}_{58}\text{O}_5\text{Si}_2\text{Na}$  ( $[\text{M}+\text{Na}]^+$ ) 841.3715, found 841.3717.

**(*R,5E,9E*)-14,16-bis((*tert*-butyldiphenylsilyl)oxy)-3-methyl-3,4,7,8-tetrahydro-1*H*-benzo[*c*][1]oxacyclotetradecine-1,11(12*H*)-dione (**17**)**

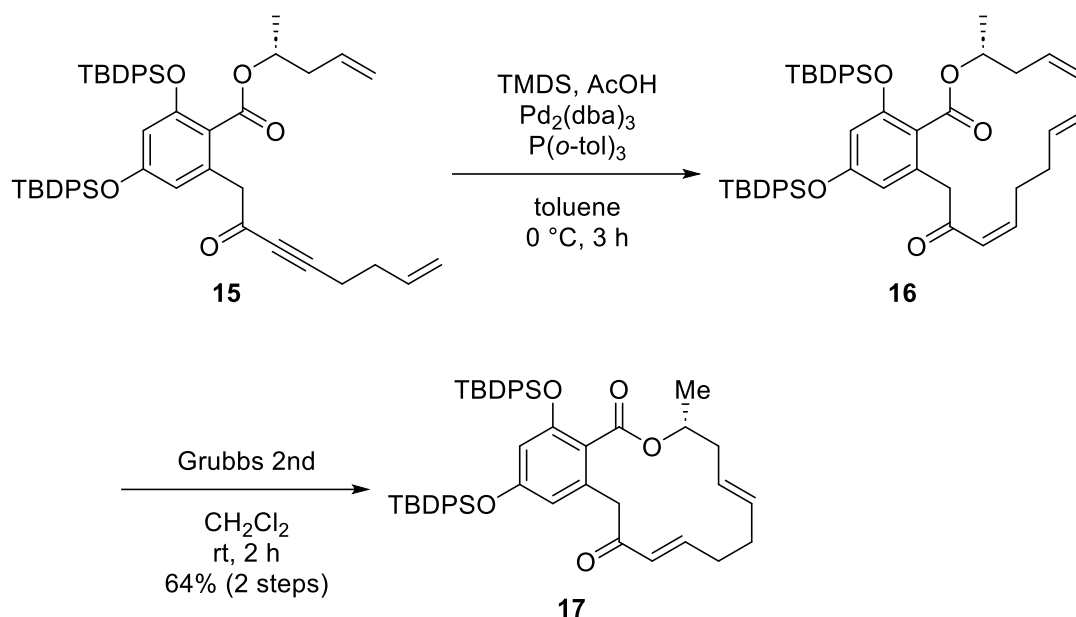

To a suspension of **15** (50.0 mg, 61.0  $\mu\text{mol}$ ), 1,1,3,3-tetramethyldisiloxane (TMDS, 10.8  $\mu\text{L}$ , 61.1  $\mu\text{mol}$ ), and AcOH (3.5  $\mu\text{L}$ , 61.2  $\mu\text{mol}$ ) in toluene (1.2 mL) was added  $\text{P}(o\text{-tol})_3$  (7.6 mg, 25  $\mu\text{mol}$ ) and  $\text{Pd}_2(\text{dba})_3$  (5.7 mg, 6.2  $\mu\text{mol}$ ) at 0  $^\circ\text{C}$ . The mixture was stirred for 3 h at 0  $^\circ\text{C}$ . The mixture was concentrated to give a residue. The residue was purified by flash column chromatography (hexane/EtOAc = 97/3 to 9/1) to give (*Z*)-**16** (50.1, 61.0  $\mu\text{mol}$ , quant.) as colorless oil. Product (*Z*)-**16** rapidly isomerized to give an *E/Z*-mixture.

(*Z*)-**16**:  $[\alpha]_{\text{D}}^{27} -6.2$  (*c* 0.7,  $\text{CHCl}_3$ );  $^1\text{H NMR}$  (600 MHz,  $\text{CDCl}_3$ )  $\delta$  7.56 (dd,  $J = 8.4, 1.8$  Hz, 2H), 7.50 (dd,  $J = 8.4, 1.2$  Hz, 2H), 7.39-7.35 (m, 2H), 7.33-7.29 (m, 6H), 7.28-7.24 (m, 4H), 7.18-7.14 (m, 4H), 6.73-6.68 (m, 1H), 6.11 (d,  $J = 1.8$  Hz, 1H), 5.90 (d,  $J = 1.8$  Hz, 1H), 5.76 (d,  $J = 16.2$  Hz, 1H), 5.39-5.30 (m, 2H), 5.07-5.04 (m, 1H), 3.60 (d,  $J = 15.6$  Hz, 1H), 3.48 (d,  $J = 15.6$  Hz, 1H), 2.28-2.08 (m, 6H), 1.39 (d,  $J = 6.0$  Hz, 3H), 0.98 (s, 9H), 0.84 (s, 9H); HRMS (ESI)  $m/z$  calcd. for  $\text{C}_{52}\text{H}_{60}\text{O}_5\text{Si}_2\text{Na}$  ( $[\text{M}+\text{Na}]^+$ ) 843.3872, found 843.3882.

To a solution of **16** (prepared above: mainly *Z*-isomer) in  $\text{CH}_2\text{Cl}_2$  (6.1 mL) was added Grubbs 2<sup>nd</sup> catalyst (8.6 mg, 9.4  $\mu\text{mol}$ ) at rt. The mixture was stirred for 2 h at rt. The reaction mixture was concentrated to give a residue. The residue was purified by flash column chromatography (hexane/EtOAc = 97/3 to 9/1) to give **17** (30.7, 38.7  $\mu\text{mol}$ , 64% over 2 steps) as a colorless oil.

$[\alpha]_{\text{D}}^{28} -49.6$  (*c* 0.15,  $\text{CHCl}_3$ ); IR (neat)  $\nu_{\text{max}} = 3071, 3049, 3016, 2933, 2858, 1724, 1622, 1595, 1469, 1428, 1344, 1262, 1176, 1113, 758, 703$   $\text{cm}^{-1}$ ;  $^{13}\text{C NMR}$  (150 MHz,  $\text{CDCl}_3$ )  $\delta$  197.5, 167.8, 156.6, 153.8, 147.8, 135.3 (4C), 135.21, 135.16 (4C), 134.5, 132.1, 132.00, 131.95, 131.8 (2C), 129.9, 129.8, 129.7, 129.5, 127.74 (2C), 127.68 (2C), 127.6 (2C), 127.5 (2C), 120.3, 114.1, 109.9, 95.2, 72.2 (d), 45.7, 38.5, 31.3, 31.0, 26.3 (6C), 19.3 (2C), 19.1; HRMS (ESI)  $m/z$  calcd. for  $\text{C}_{50}\text{H}_{57}\text{O}_5\text{Si}_2$  ( $[\text{M}+\text{H}]^+$ ) 793.3739, found 793.3753.

### Monocillin II (**1**)

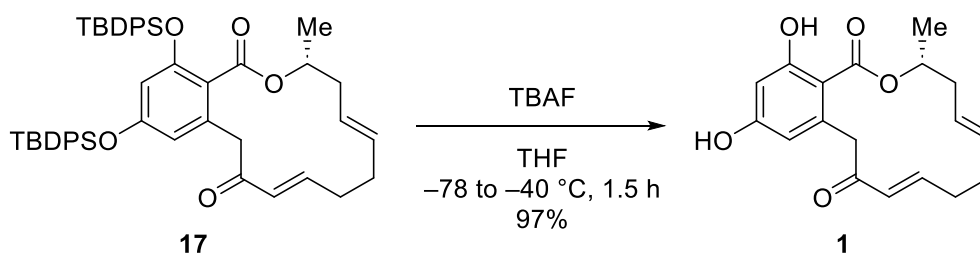

To a suspension of **17** (30.0 mg, 37.8  $\mu\text{mol}$ ) in THF (1.9 mL) was added TBAF (1.0 N in THF, 113.4  $\mu\text{L}$ , 113  $\mu\text{mol}$ ) at  $-78\text{ }^\circ\text{C}$ . The mixture was stirred for 1.5 h at  $-40\text{ }^\circ\text{C}$ . The reaction mixture was quenched by the addition of sat.  $\text{NH}_4\text{Cl}$  aq. and diluted with EtOAc. The aqueous layer was extracted with EtOAc. The combined organic solution was washed with brine, dried over  $\text{Na}_2\text{SO}_4$ , filtered, and concentrated to give a residue. The residue was purified by flash column chromatography (hexane/EtOAc = 3/2) to give **1** (11.5 mg, 36.4  $\mu\text{mol}$ , 97%) as a white solid.

Mp. = 193.5–197.0  $^\circ\text{C}$ ;  $[\alpha]_{\text{D}}^{26} +45.1$  ( $c$  0.06,  $\text{CHCl}_3$ ); IR (KBr)  $\nu_{\text{max}}$  = 3357, 3073, 2930, 2857, 1723, 1685, 1646, 1619, 1429, 1343, 1313, 1262, 1176, 1112, 703  $\text{cm}^{-1}$ ;  $^1\text{H}$  NMR (600 MHz,  $\text{CD}_3\text{OD}$ )  $\delta$  6.74–6.69 (m, 1H), 6.26 (d,  $J$  = 2.4 Hz, 1H), 6.20 (d,  $J$  = 2.4 Hz, 1H), 5.84 (d,  $J$  = 15.6 Hz, 1H), 5.33–5.22 (m, 3H), 3.98 (d,  $J$  = 17.4 Hz, 1H), 3.90 (d,  $J$  = 17.4 Hz, 1H), 2.63–2.59 (m, 1H), 2.27–2.17 (m, 5H), 1.29 (d,  $J$  = 7.2 Hz, 3H);  $^{13}\text{C}$  NMR (150 MHz,  $\text{CD}_3\text{OD}$ )  $\delta$  199.9, 171.3, 165.7, 163.7, 149.8, 140.6, 133.0, 131.0, 128.7, 113.1, 107.3, 103.1, 73.4, 49.4–48.7 (overlap), 38.2, 32.3, 32.1, 18.8; HRMS (ESI)  $m/z$  calcd. for  $\text{C}_{18}\text{H}_{20}\text{O}_5\text{Na}$  ( $[\text{M}+\text{Na}]^+$ ) 339.1203, found 339.1212.

### 3. Computational Details

Conformation analyses of monocillins II (**1**) and VI (**2**) were performed by BEST method in BIOVIA Discovery Studio 2022 Client. Conformers within 5.25 kcal/mol energy differences were optimized using DFT calculations at the B3LYP/6-31G(d,p) level, implemented in the Gaussian 16 program package.<sup>S2</sup> The vibrational frequencies were computed at the same level to check whether each optimized structure is an energy minimum (no imaginary frequency).

**Table S1. Number of Imaginary Frequencies and Atom Coordinates for Monocillin II (1) Optimized by DFT/B3LYP/6-31G(d,p) Level.**<sup>S2</sup>

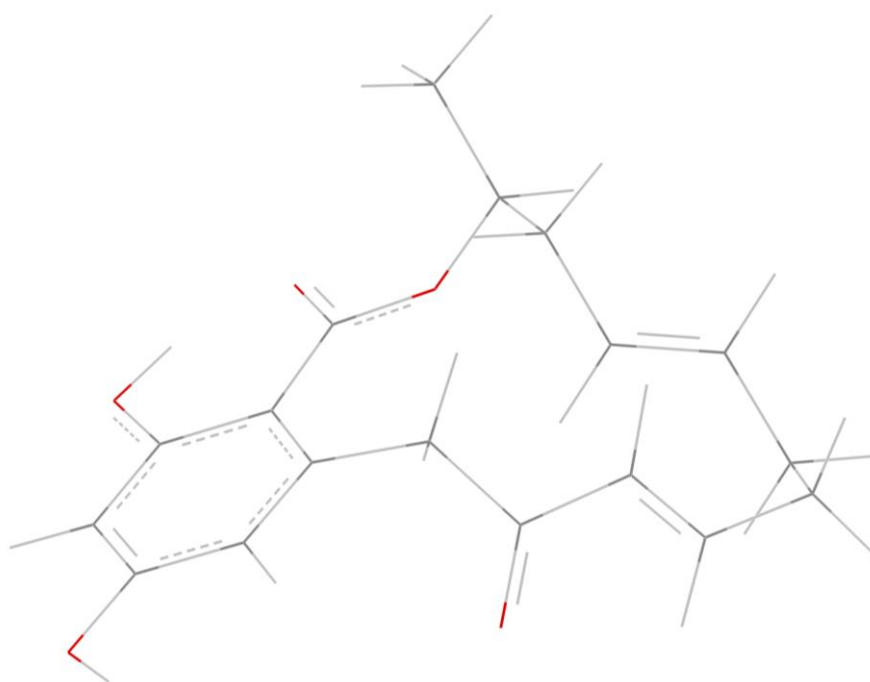

Number of imaginary frequencies = 0.

| Center<br>Number | Atomic<br>Number | Atomic<br>Type | Coordinates (Angstroms) |           |           |
|------------------|------------------|----------------|-------------------------|-----------|-----------|
|                  |                  |                | X                       | Y         | Z         |
| 1                | 6                | 0              | -3.973674               | 0.299786  | -0.811045 |
| 2                | 6                | 0              | -4.037692               | -0.919174 | -0.156678 |
| 3                | 6                | 0              | -2.946837               | -1.377910 | 0.599343  |
| 4                | 6                | 0              | -1.778043               | -0.637468 | 0.708809  |
| 5                | 6                | 0              | -1.675591               | 0.621180  | 0.036895  |
| 6                | 6                | 0              | -2.809115               | 1.067422  | -0.726385 |
| 7                | 8                | 0              | -2.823012               | 2.228836  | -1.392241 |
| 8                | 8                | 0              | -5.183127               | -1.640689 | -0.270963 |
| 9                | 6                | 0              | -0.661813               | -1.291535 | 1.503604  |
| 10               | 6                | 0              | 0.237266                | -2.169476 | 0.605917  |
| 11               | 6                | 0              | 1.706052                | -1.983465 | 0.717605  |
| 12               | 8                | 0              | -0.262538               | -2.980280 | -0.158636 |
| 13               | 6                | 0              | 2.537822                | -2.520995 | -0.187536 |
| 14               | 6                | 0              | 4.012914                | -2.282398 | -0.272672 |
| 15               | 6                | 0              | -0.513913               | 1.524237  | 0.055868  |
| 16               | 8                | 0              | 0.524661                | 1.136874  | 0.814394  |
| 17               | 8                | 0              | -0.473003               | 2.589599  | -0.578241 |
| 18               | 6                | 0              | 1.693759                | 2.005270  | 0.985395  |
| 19               | 6                | 0              | 2.508929                | 2.181203  | -0.310878 |
| 20               | 6                | 0              | 2.870103                | 0.873297  | -0.965633 |
| 21               | 6                | 0              | 4.015650                | 0.216662  | -0.760159 |
| 22               | 6                | 0              | 4.342415                | -1.148882 | -1.299688 |
| 23               | 6                | 0              | 1.329569                | 3.317559  | 1.673822  |
| 24               | 1                | 0              | -4.808739               | 0.666113  | -1.394989 |
| 25               | 1                | 0              | -3.008970               | -2.344367 | 1.091366  |
| 26               | 1                | 0              | -1.933289               | 2.646470  | -1.254446 |
| 27               | 1                | 0              | -5.078288               | -2.478792 | 0.199215  |
| 28               | 1                | 0              | -1.116005               | -1.977874 | 2.228126  |
| 29               | 1                | 0              | -0.069528               | -0.568264 | 2.056627  |
| 30               | 1                | 0              | 2.081613                | -1.347532 | 1.514668  |
| 31               | 1                | 0              | 2.083531                | -3.117656 | -0.978655 |
| 32               | 1                | 0              | 4.517545                | -3.201196 | -0.594459 |
| 33               | 1                | 0              | 4.422134                | -2.008724 | 0.706456  |
| 34               | 1                | 0              | 2.295544                | 1.400186  | 1.670564  |
| 35               | 1                | 0              | 1.955100                | 2.824660  | -0.998963 |
| 36               | 1                | 0              | 3.422923                | 2.714763  | -0.021006 |



|    |   |   |          |           |           |
|----|---|---|----------|-----------|-----------|
| 37 | 1 | 0 | 2.115535 | 0.428327  | -1.612985 |
| 38 | 1 | 0 | 4.762988 | 0.658945  | -0.097741 |
| 39 | 1 | 0 | 3.789399 | -1.337383 | -2.226920 |
| 40 | 1 | 0 | 5.408781 | -1.211268 | -1.546105 |
| 41 | 1 | 0 | 0.768870 | 3.976781  | 1.010938  |
| 42 | 1 | 0 | 0.732256 | 3.123932  | 2.569699  |
| 43 | 1 | 0 | 2.247942 | 3.826270  | 1.984619  |

**Table S2. Number of Imaginary Frequencies and Atom Coordinates for Monocillin VI (2) Optimized by DFT/B3LYP/6-31G(d,p) Level.<sup>S2</sup>**

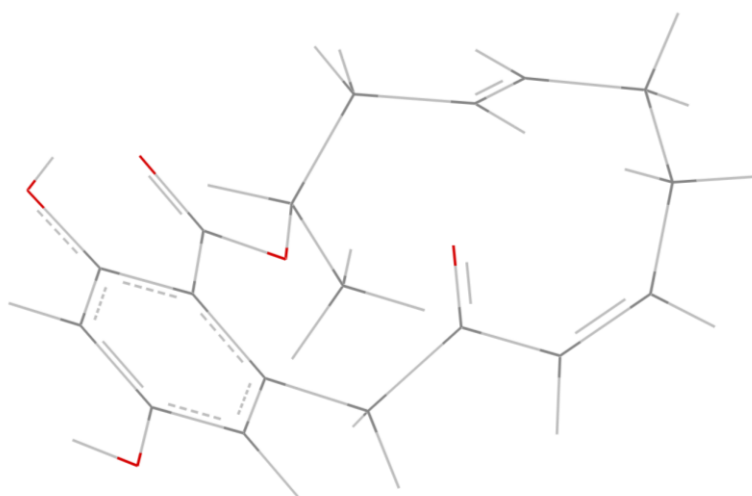

Number of imaginary frequencies = 0.

| Center Number | Atomic Number | Atomic Type | Coordinates (Angstroms) |           |           |
|---------------|---------------|-------------|-------------------------|-----------|-----------|
|               |               |             | X                       | Y         | Z         |
| 1             | 6             | 0           | -4.095708               | -0.062814 | -0.628545 |
| 2             | 6             | 0           | -3.997610               | 1.174056  | -0.011884 |
| 3             | 6             | 0           | -2.809129               | 1.555300  | 0.631135  |
| 4             | 6             | 0           | -1.711378               | 0.709557  | 0.668715  |
| 5             | 6             | 0           | -1.783937               | -0.576378 | 0.050846  |
| 6             | 6             | 0           | -3.002099               | -0.937327 | -0.608683 |
| 7             | 8             | 0           | -3.175808               | -2.111319 | -1.227380 |
| 8             | 8             | 0           | -5.020119               | 2.069915  | 0.006429  |
| 9             | 6             | 0           | -0.476457               | 1.244872  | 1.354855  |
| 10            | 6             | 0           | 0.653359                | 1.644025  | 0.394587  |

|    |   |   |           |           |           |
|----|---|---|-----------|-----------|-----------|
| 11 | 6 | 0 | 1.902369  | 2.086175  | 1.067749  |
| 12 | 8 | 0 | 0.505149  | 1.610080  | -0.817469 |
| 13 | 6 | 0 | 3.056651  | 2.421135  | 0.462496  |
| 14 | 6 | 0 | 3.377030  | 2.397375  | -1.003445 |
| 15 | 6 | 0 | -0.715621 | -1.585931 | 0.037567  |
| 16 | 8 | 0 | 0.397984  | -1.295461 | 0.733635  |
| 17 | 8 | 0 | -0.820154 | -2.672561 | -0.552053 |
| 18 | 6 | 0 | 1.421524  | -2.337605 | 0.827651  |
| 19 | 6 | 0 | 2.351538  | -2.300667 | -0.401723 |
| 20 | 6 | 0 | 3.281217  | -1.119934 | -0.480126 |
| 21 | 6 | 0 | 3.175623  | -0.122787 | -1.361703 |
| 22 | 6 | 0 | 4.085733  | 1.071374  | -1.418414 |
| 23 | 6 | 0 | 2.117397  | -2.113909 | 2.162624  |
| 24 | 1 | 0 | -4.999340 | -0.385170 | -1.136949 |
| 25 | 1 | 0 | -2.767271 | 2.536546  | 1.090363  |
| 26 | 1 | 0 | -2.318266 | -2.606206 | -1.135748 |
| 27 | 1 | 0 | -5.773305 | 1.701778  | -0.475104 |
| 28 | 1 | 0 | -0.742789 | 2.145225  | 1.923940  |
| 29 | 1 | 0 | -0.067661 | 0.535208  | 2.078334  |
| 30 | 1 | 0 | 1.860379  | 2.127606  | 2.154708  |
| 31 | 1 | 0 | 3.884803  | 2.701691  | 1.115454  |
| 32 | 1 | 0 | 4.055631  | 3.229304  | -1.228311 |
| 33 | 1 | 0 | 2.468721  | 2.517685  | -1.593888 |
| 34 | 1 | 0 | 0.899377  | -3.296958 | 0.825176  |
| 35 | 1 | 0 | 1.725423  | -2.359426 | -1.296567 |
| 36 | 1 | 0 | 2.937638  | -3.230483 | -0.369104 |
| 37 | 1 | 0 | 4.099039  | -1.093804 | 0.241407  |
| 38 | 1 | 0 | 2.352882  | -0.131030 | -2.076032 |
| 39 | 1 | 0 | 4.963796  | 0.906486  | -0.781291 |
| 40 | 1 | 0 | 4.458245  | 1.208073  | -2.442181 |
| 41 | 1 | 0 | 2.568481  | -1.119230 | 2.209749  |
| 42 | 1 | 0 | 2.907887  | -2.858528 | 2.300656  |
| 43 | 1 | 0 | 1.406908  | -2.213111 | 2.987878  |

---

### 3. <sup>1</sup>H and <sup>13</sup>C NMR spectroscopic data

Figure S1. <sup>1</sup>H NMR spectrum (600 MHz, CDCl<sub>3</sub>) of compound 10.

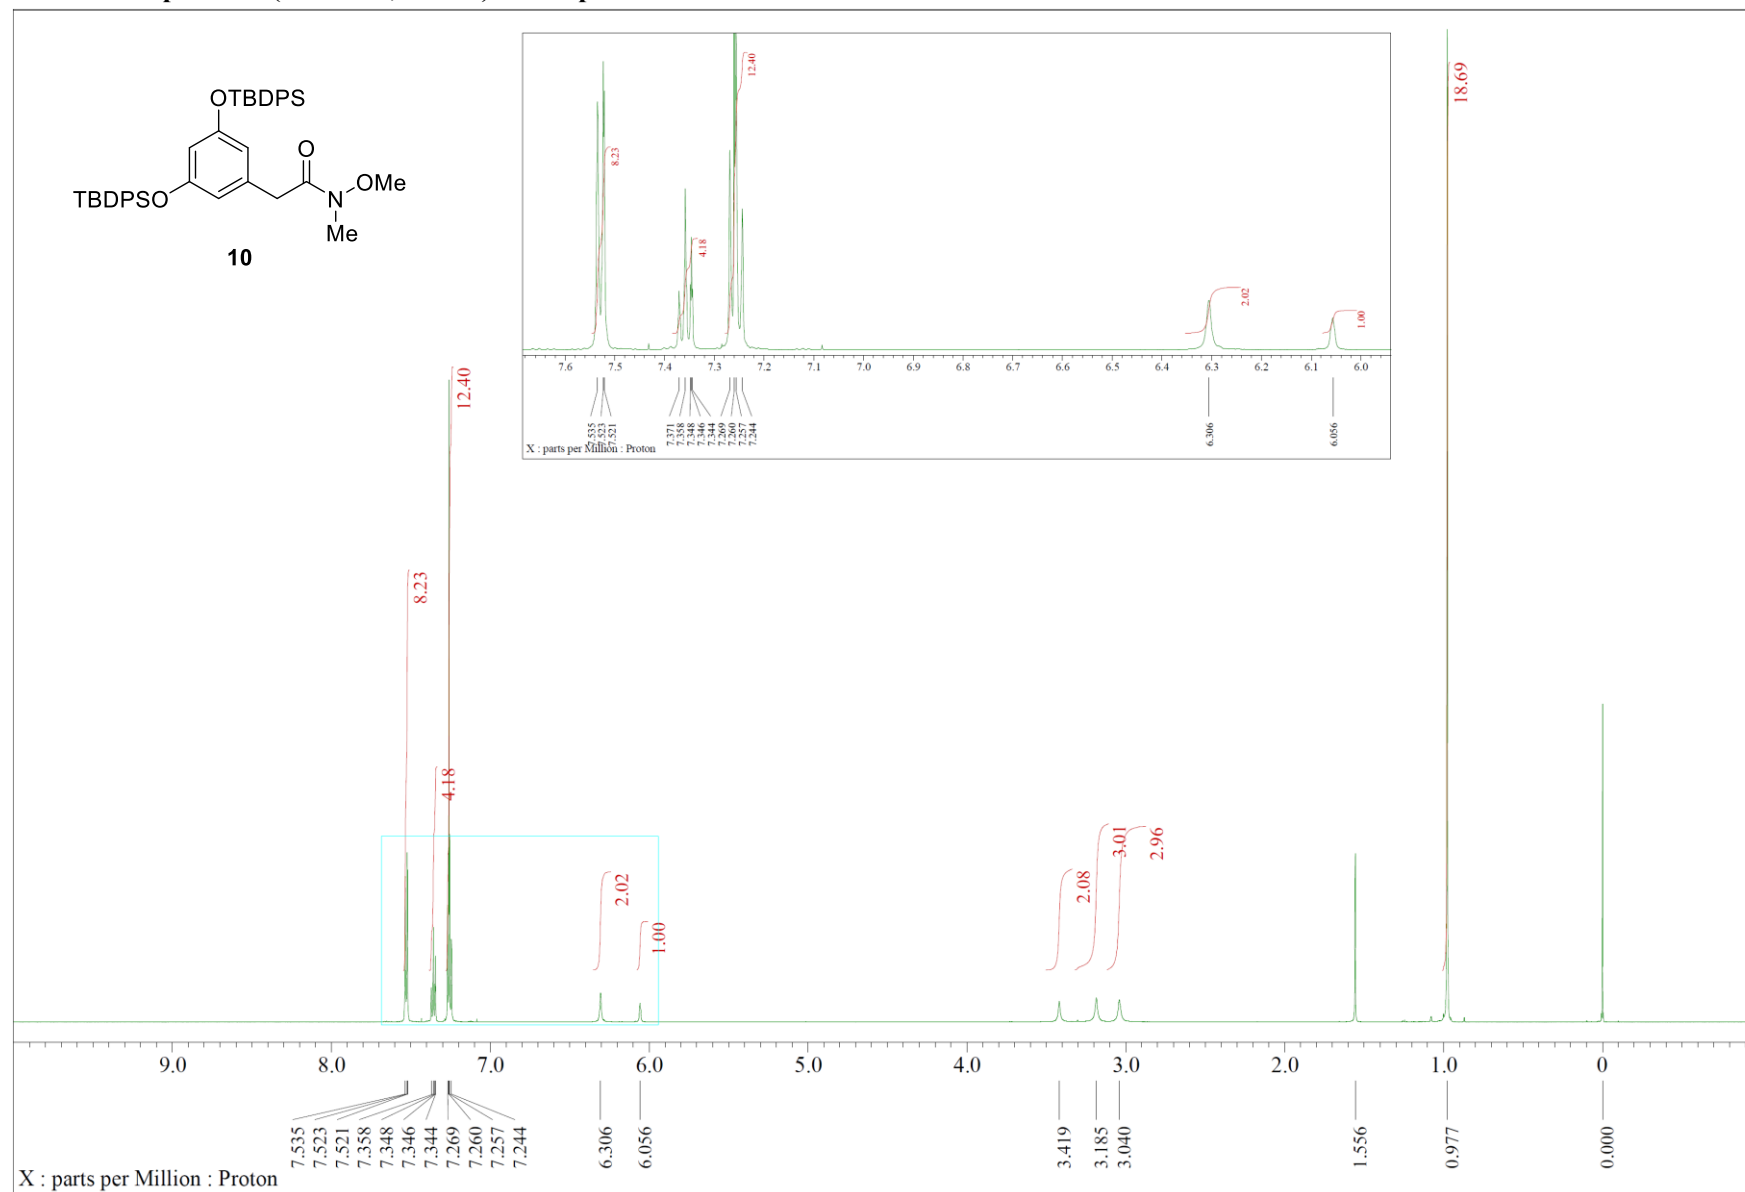

Figure S2.  $^{13}\text{C}$  NMR spectrum (150 MHz,  $\text{CDCl}_3$ ) of compound 10.

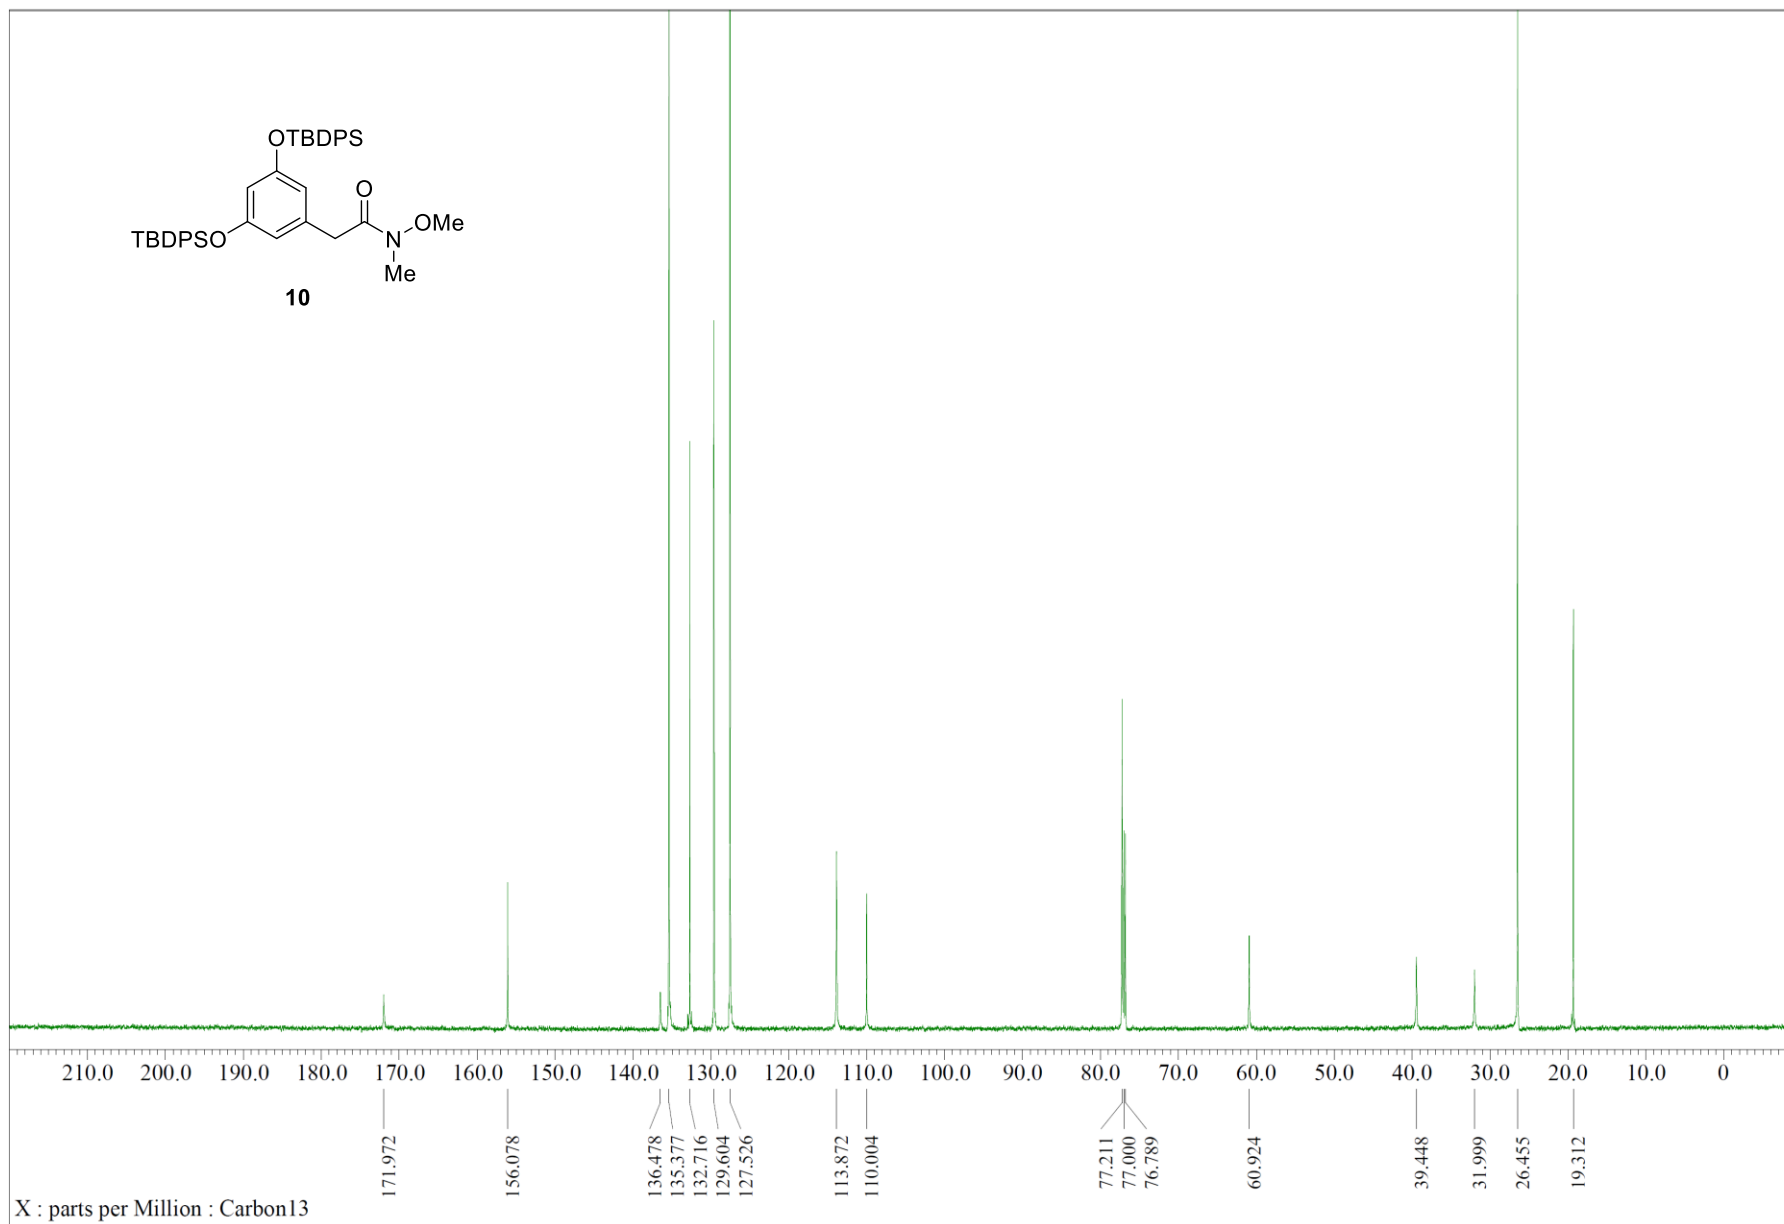

Figure S3. <sup>1</sup>H NMR spectrum (600 MHz, CDCl<sub>3</sub>) of compound 11.

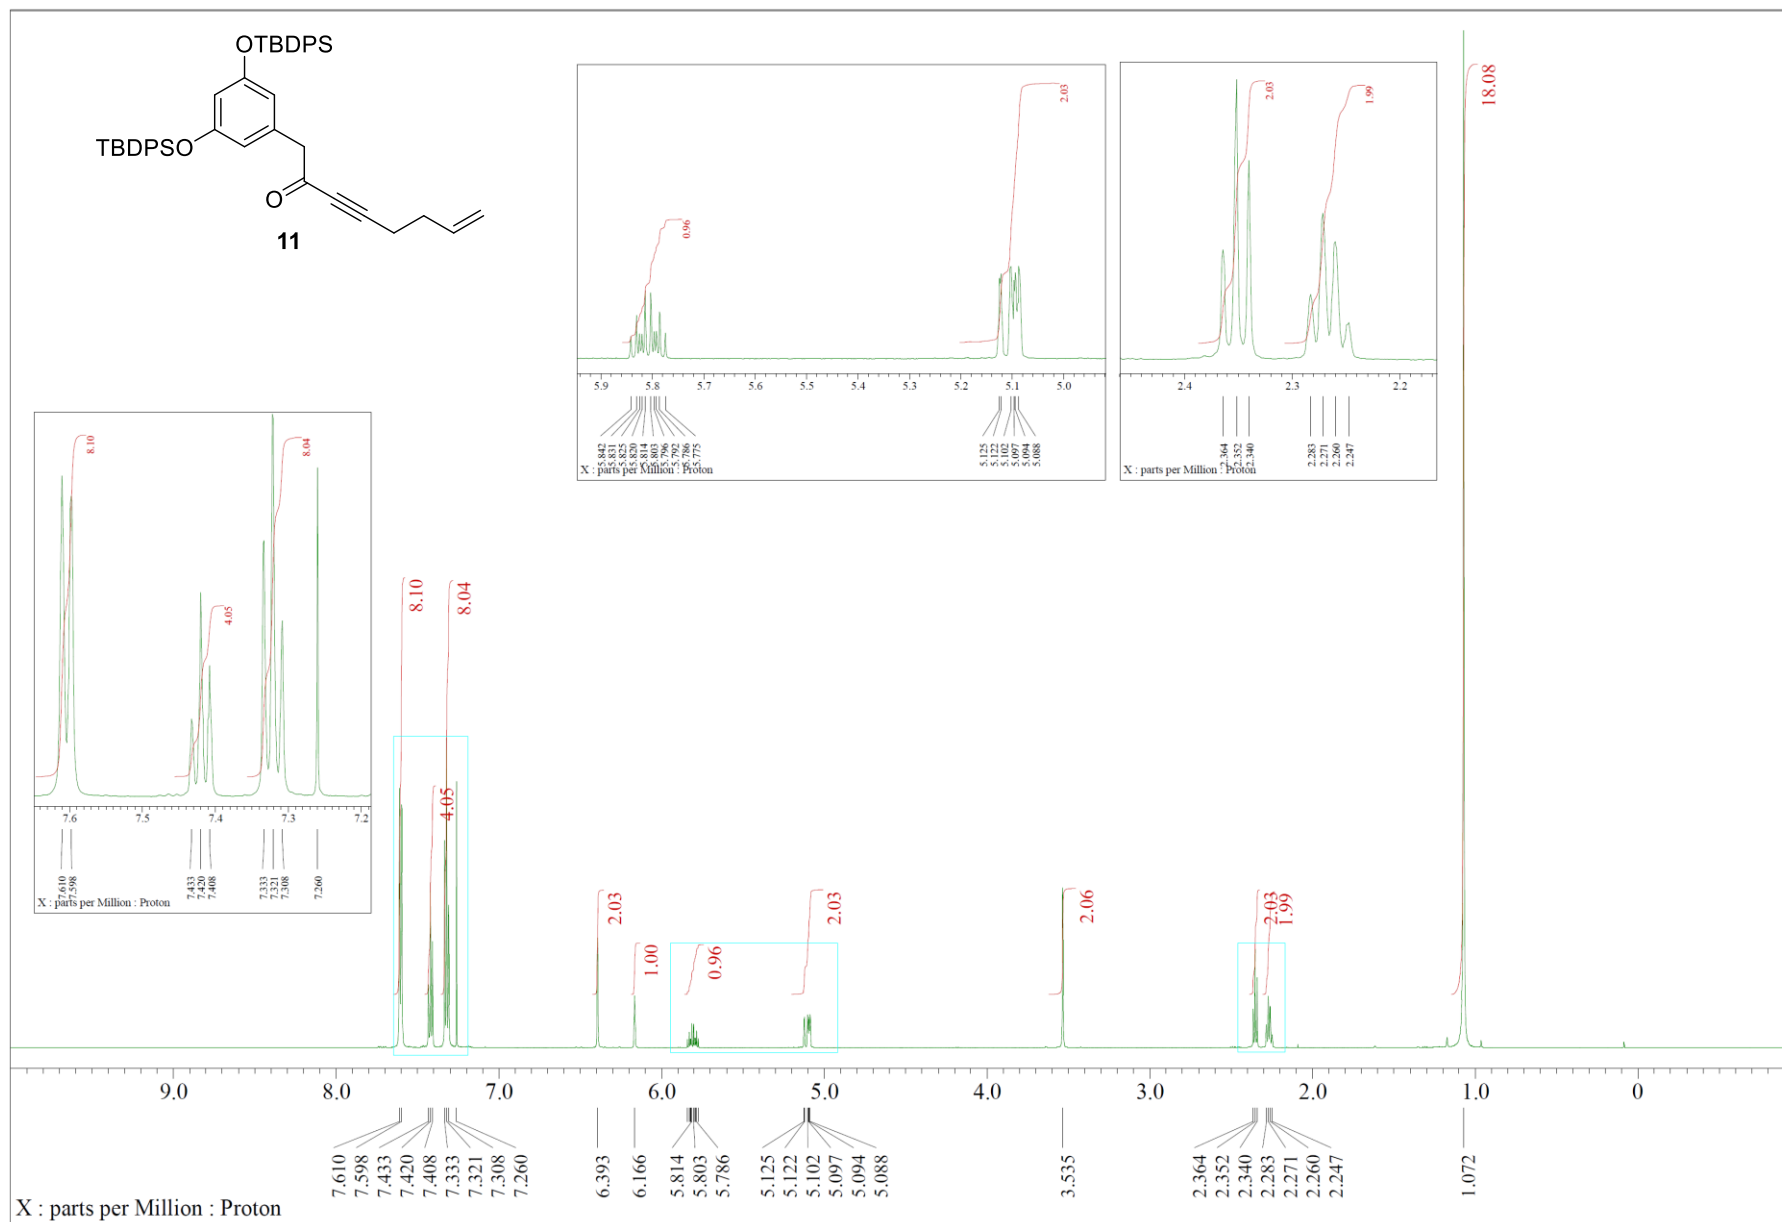

Figure S4.  $^{13}\text{C}$  NMR spectrum (150 MHz,  $\text{CDCl}_3$ ) of compound 11.

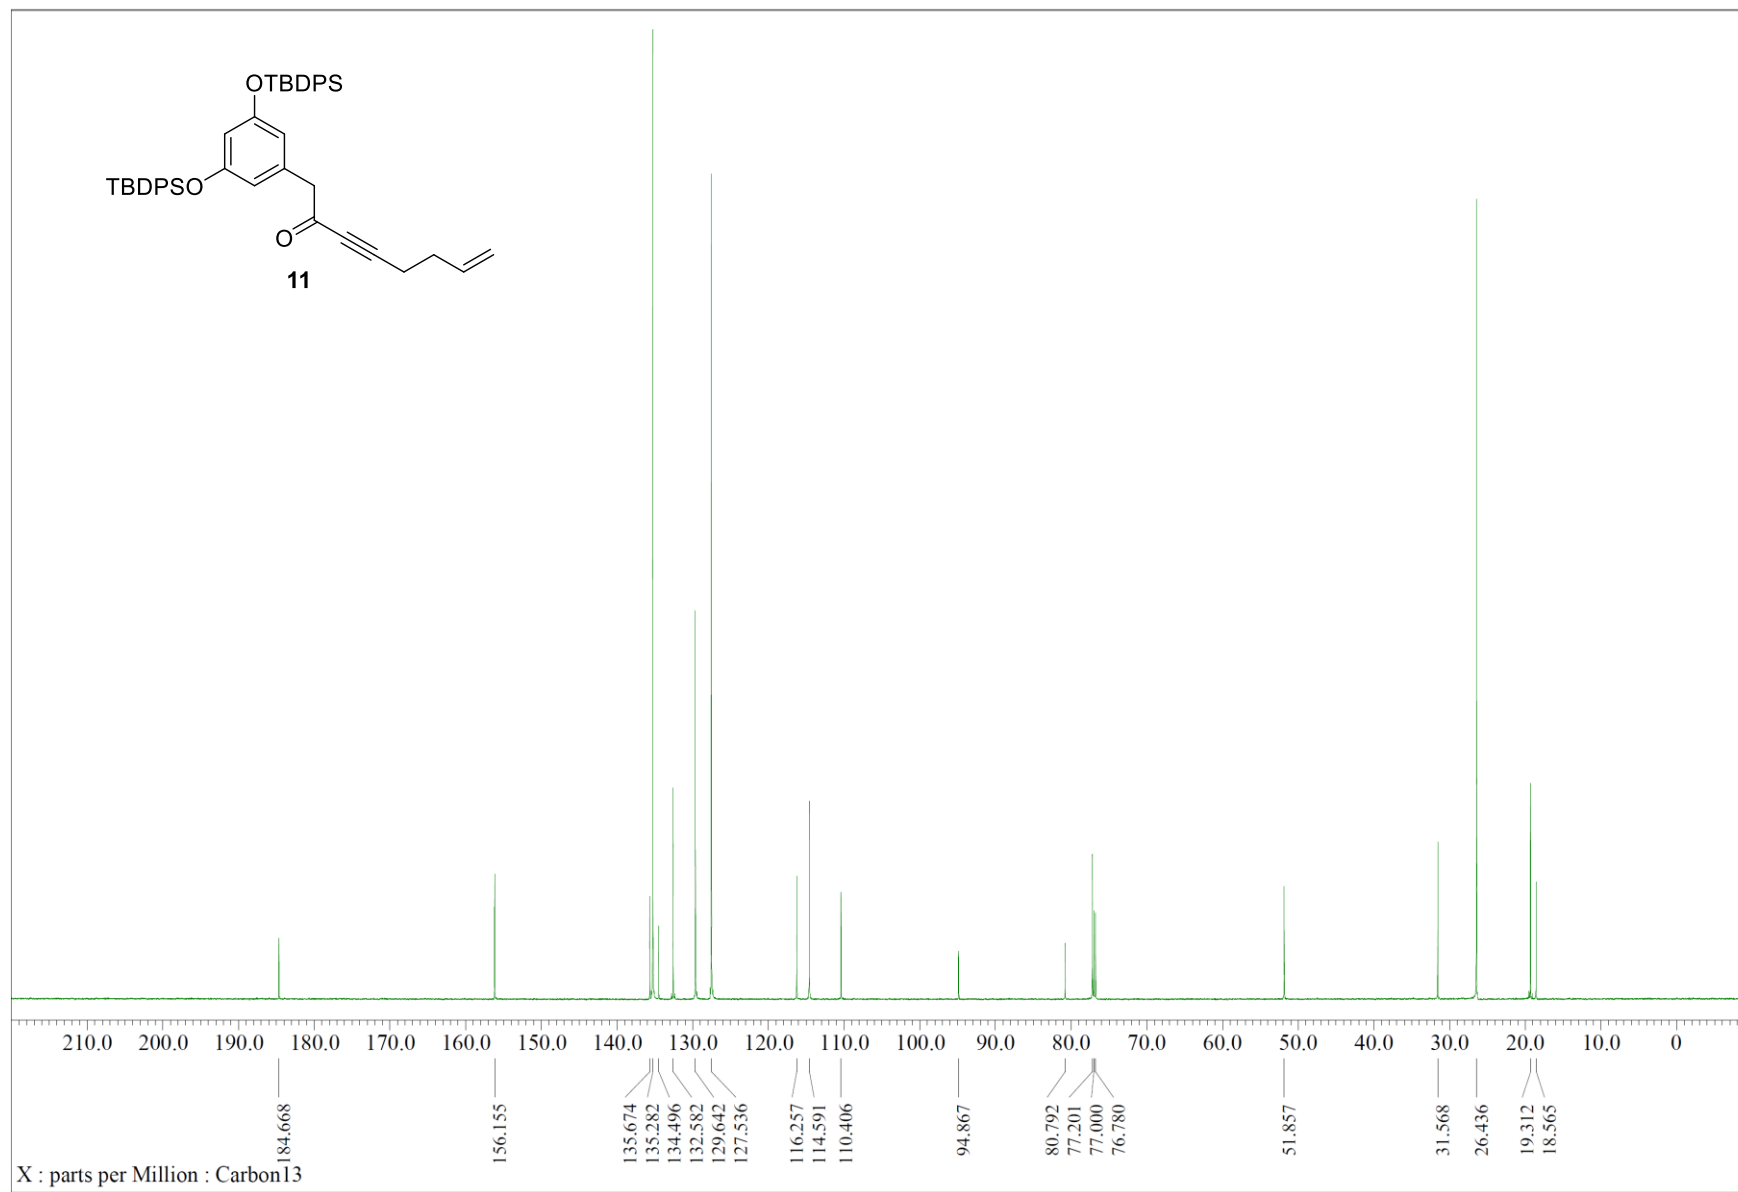

Figure S5. <sup>1</sup>H NMR spectrum (600 MHz, CDCl<sub>3</sub>) of compound 12.

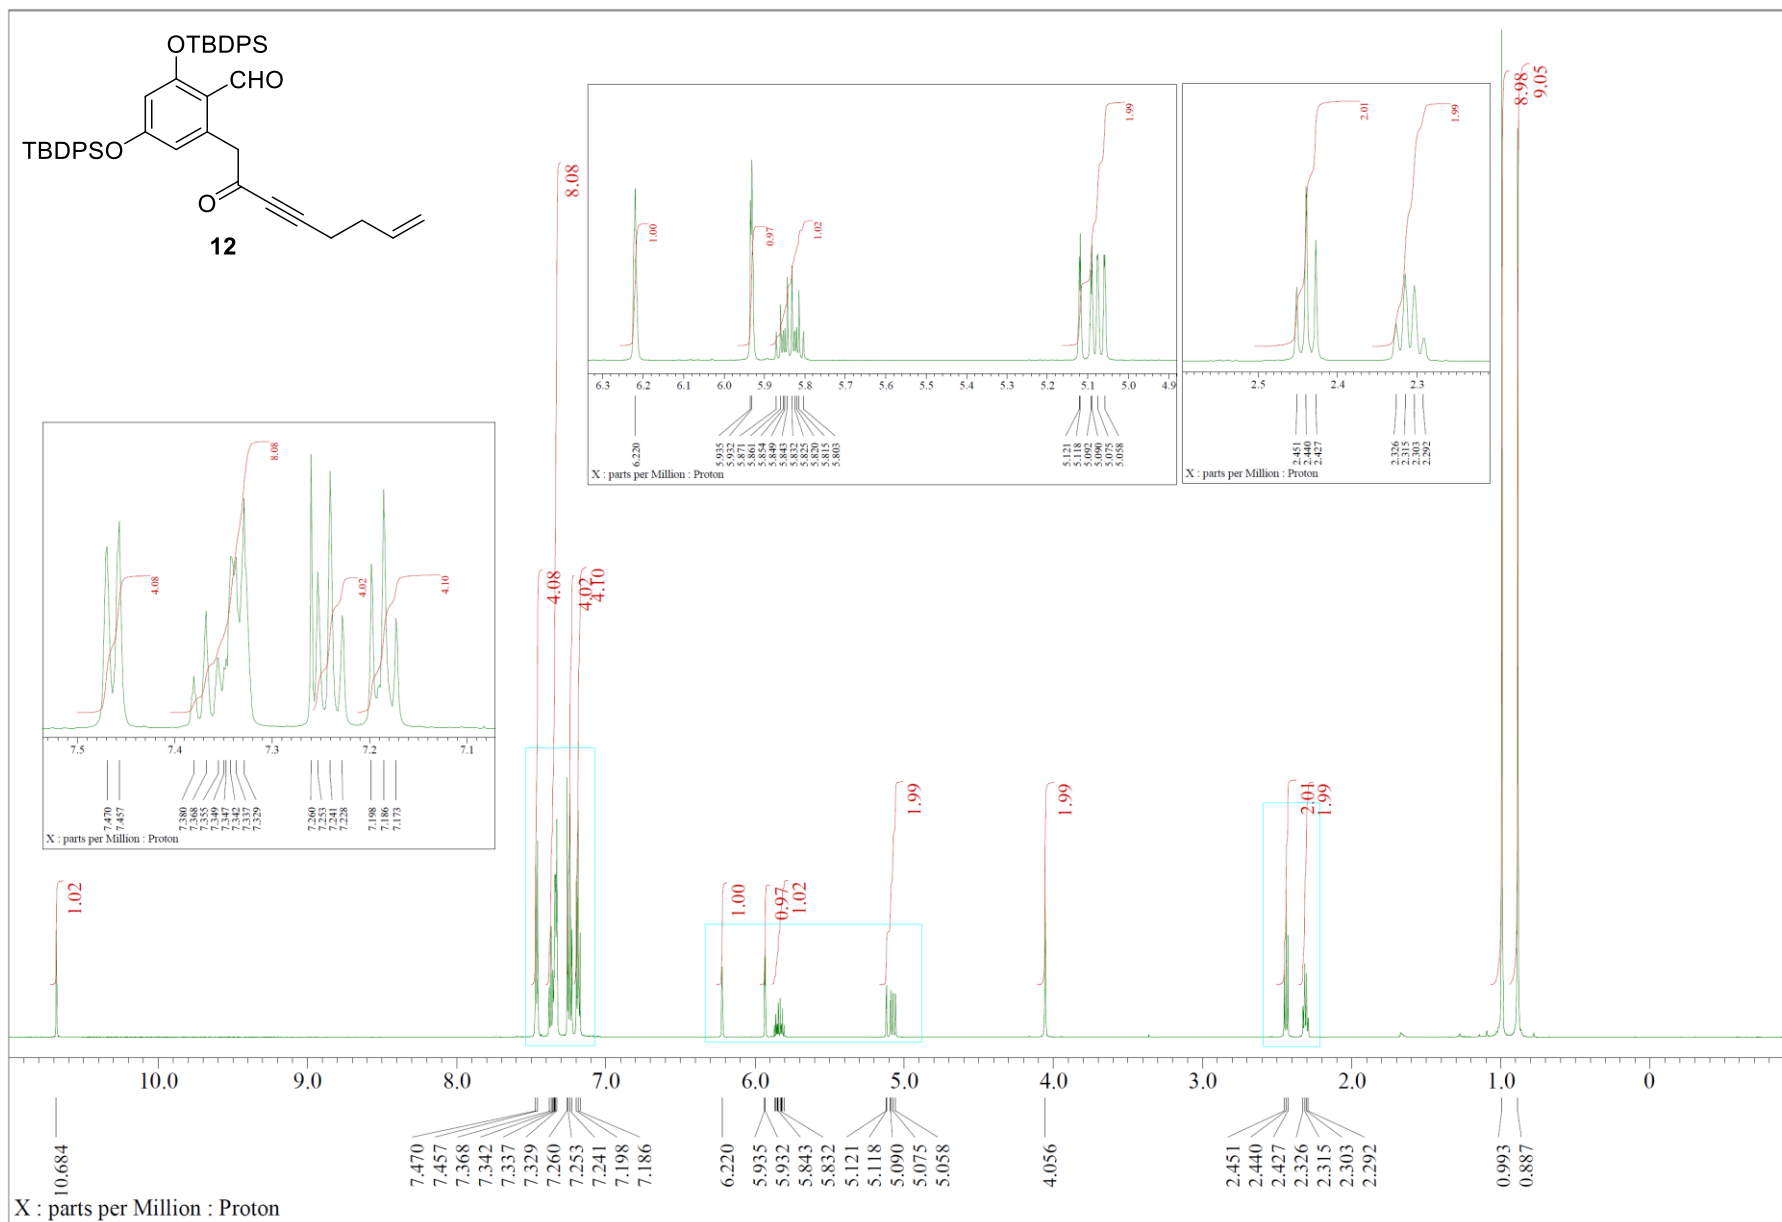

Figure S6. <sup>13</sup>C NMR spectrum (150 MHz, CDCl<sub>3</sub>) of compound 12.

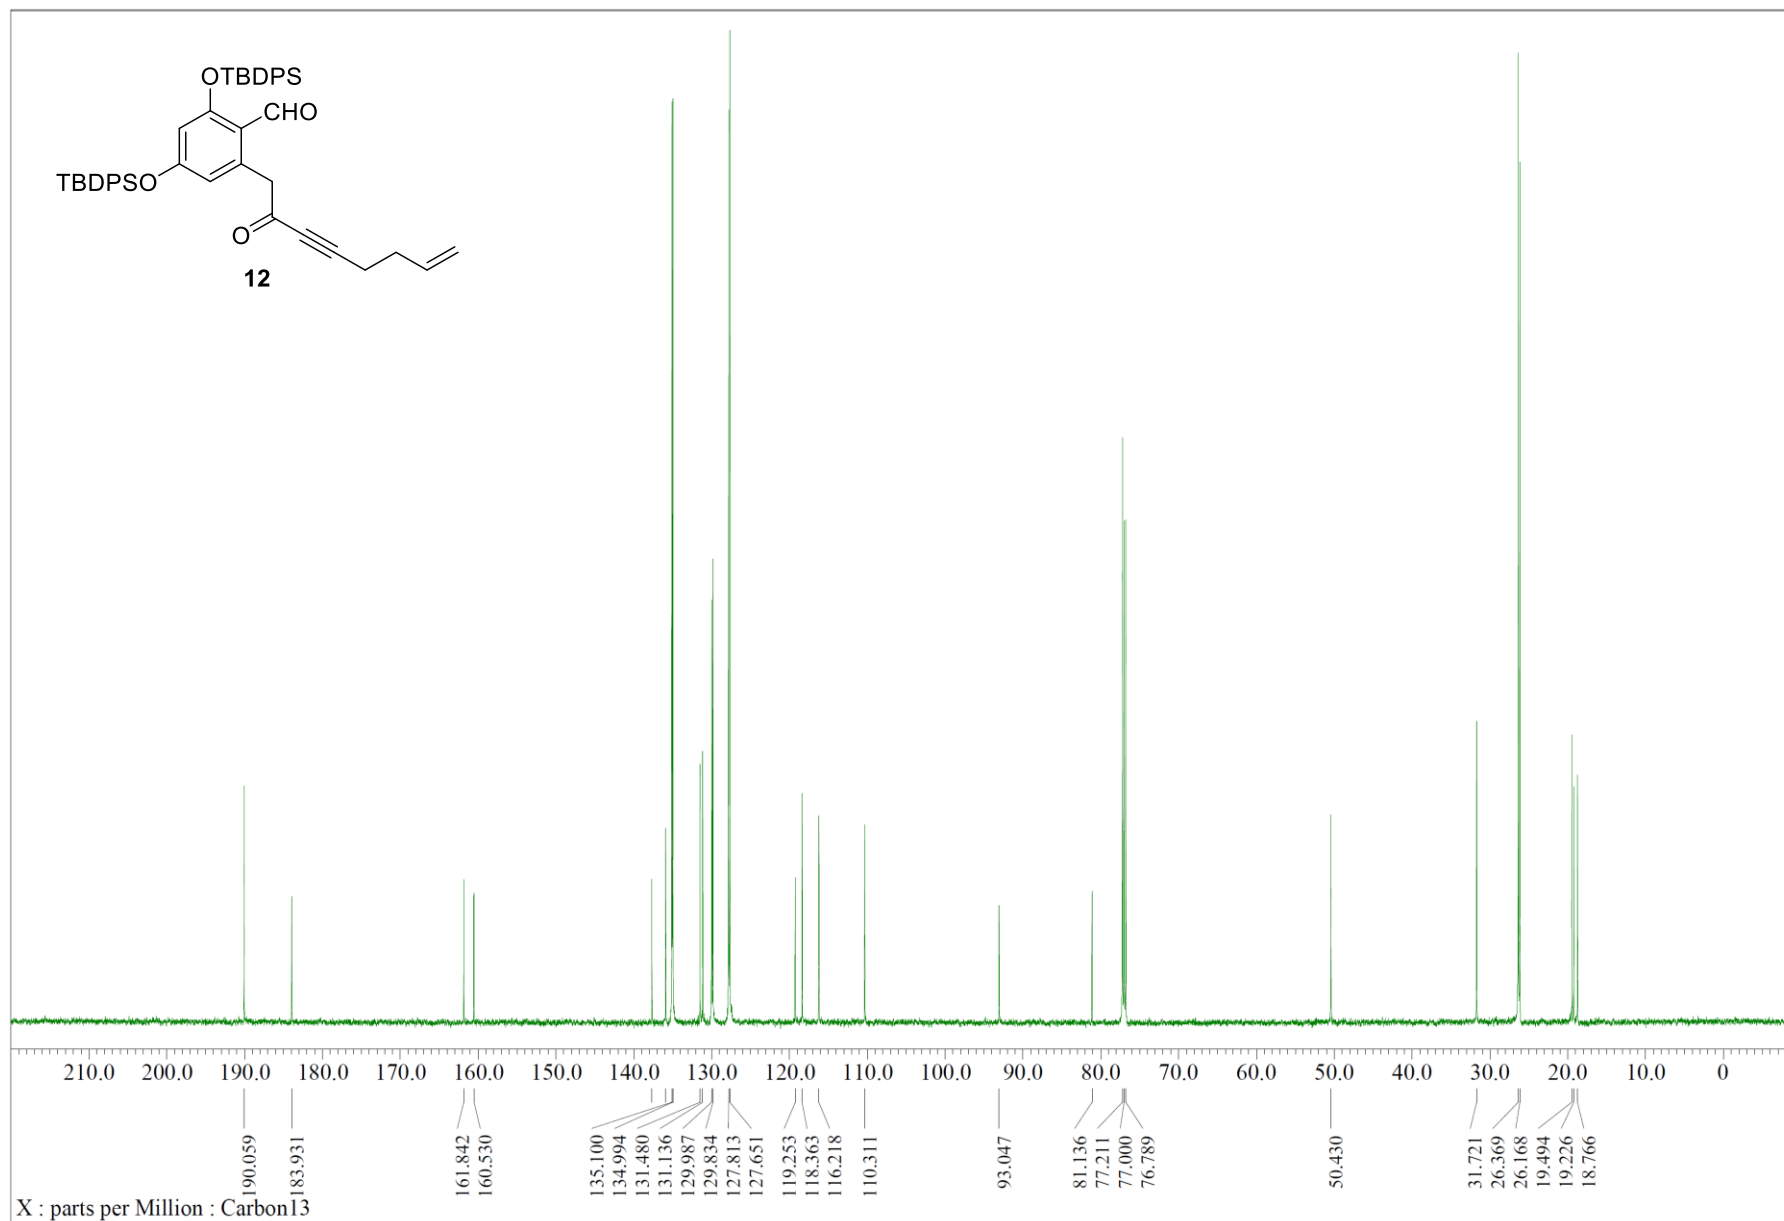



Figure S7. <sup>1</sup>H NMR spectrum (600 MHz, CDCl<sub>3</sub>) of compound 13.

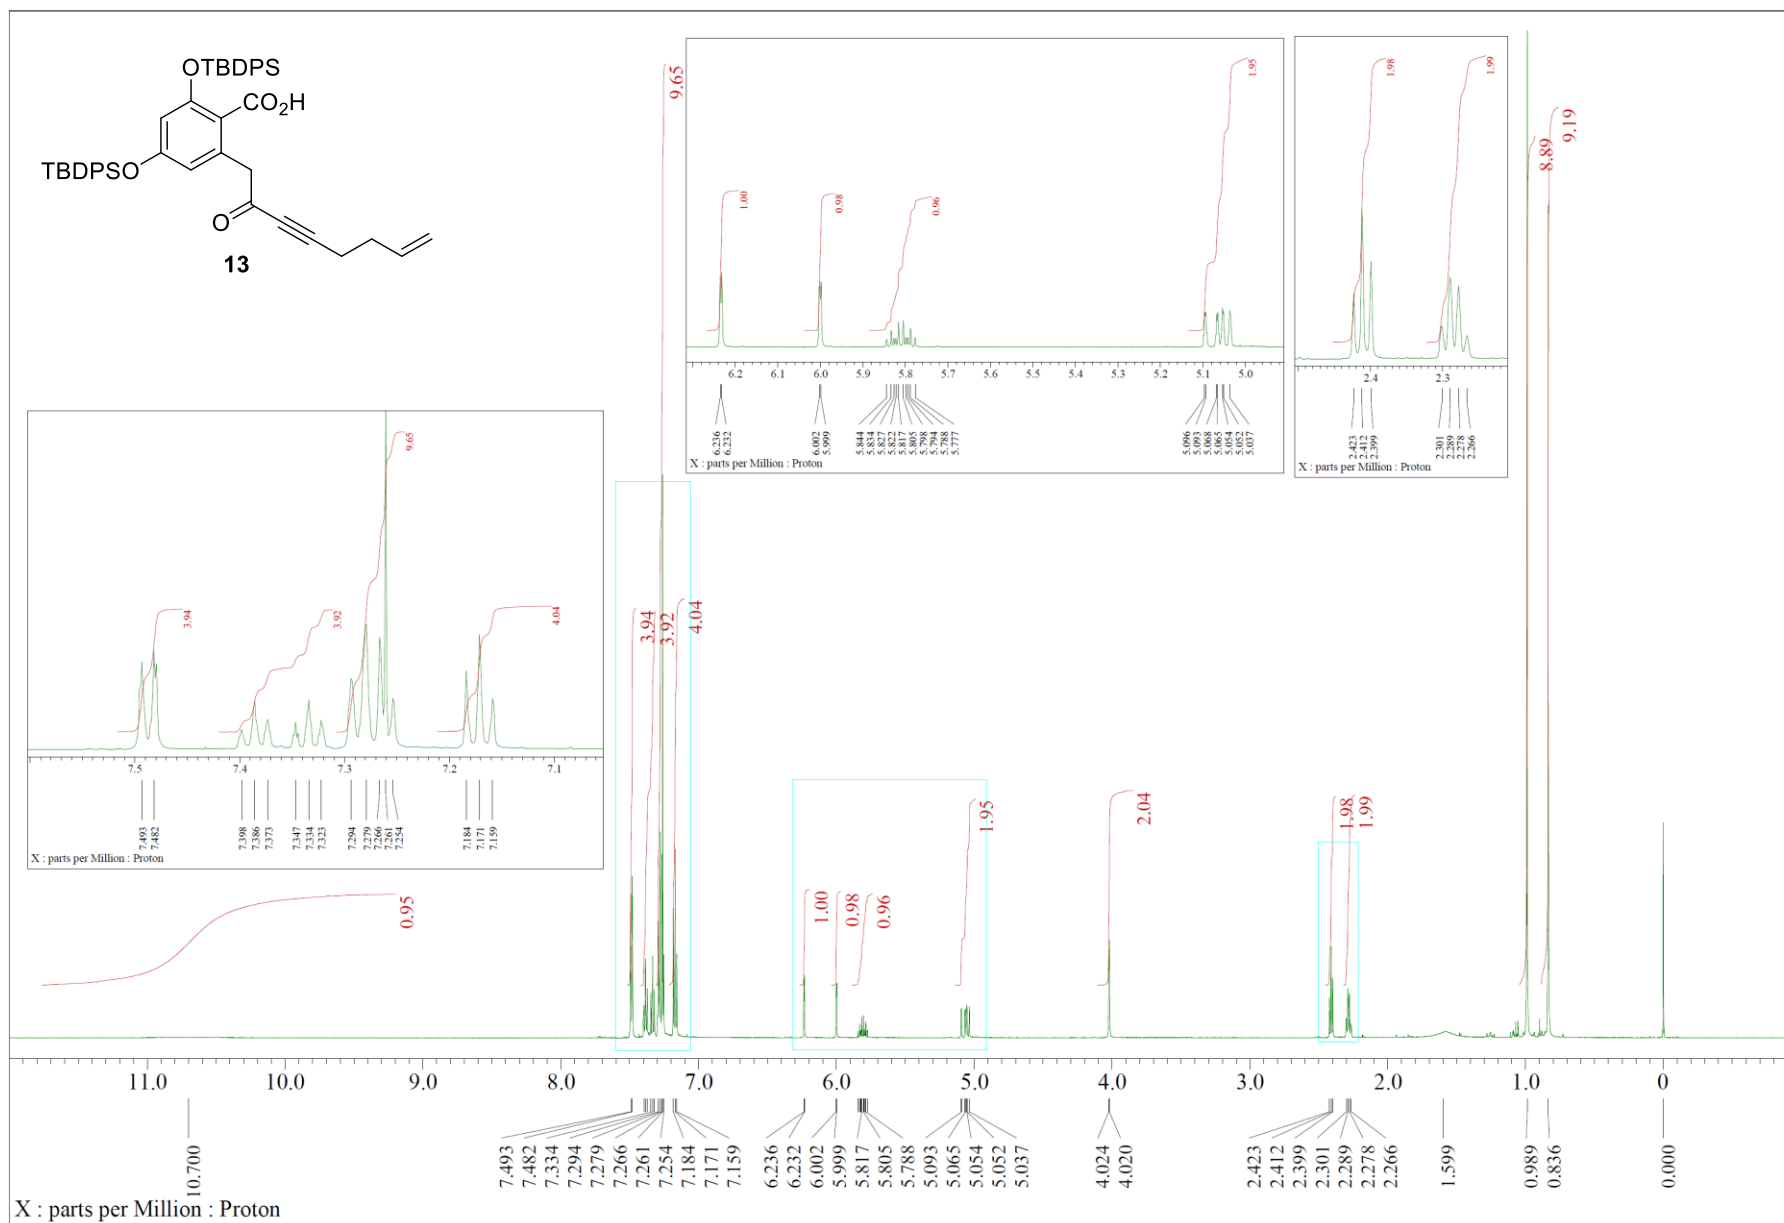

Figure S8.  $^{13}\text{C}$  NMR spectrum (150 MHz,  $\text{CDCl}_3$ ) of compound 13.

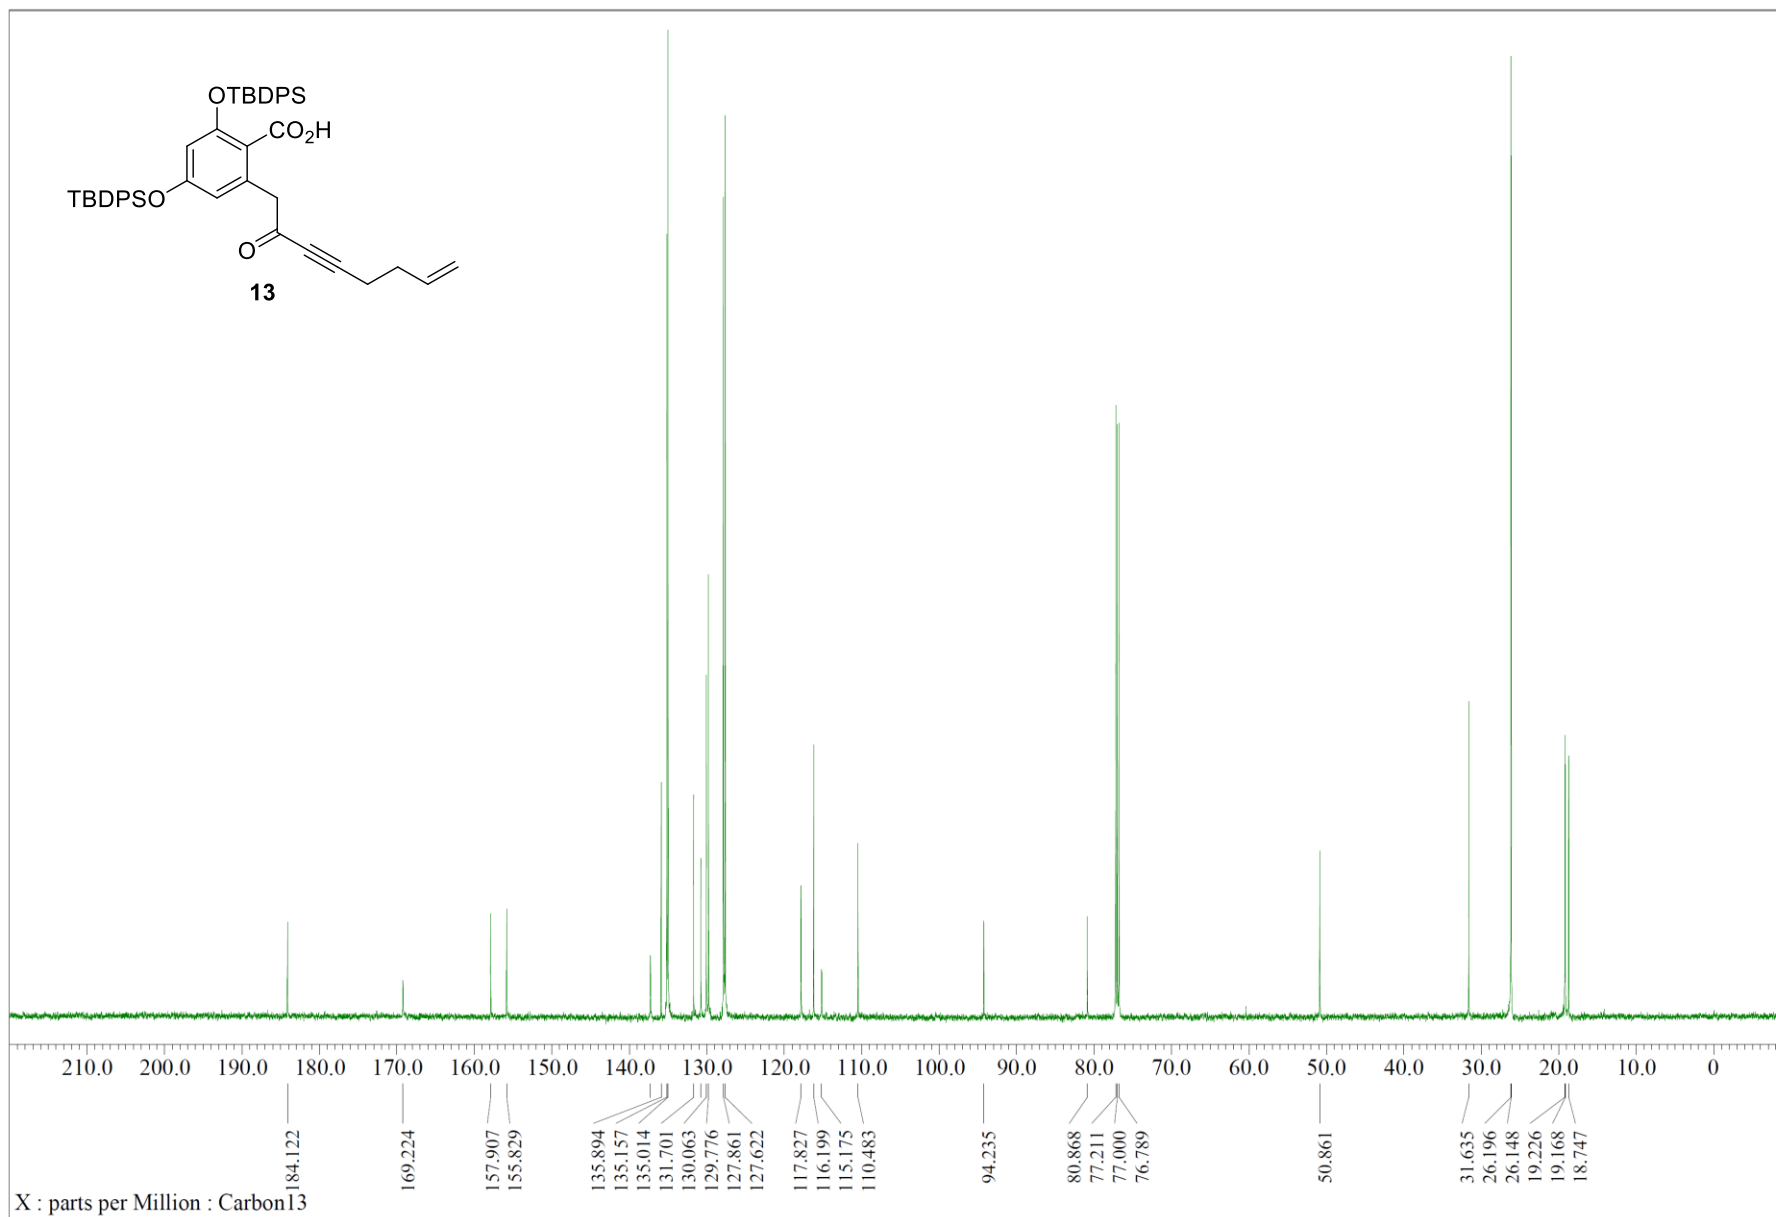

Figure S9. <sup>1</sup>H NMR spectrum (600 MHz, CDCl<sub>3</sub>) of compound 15.

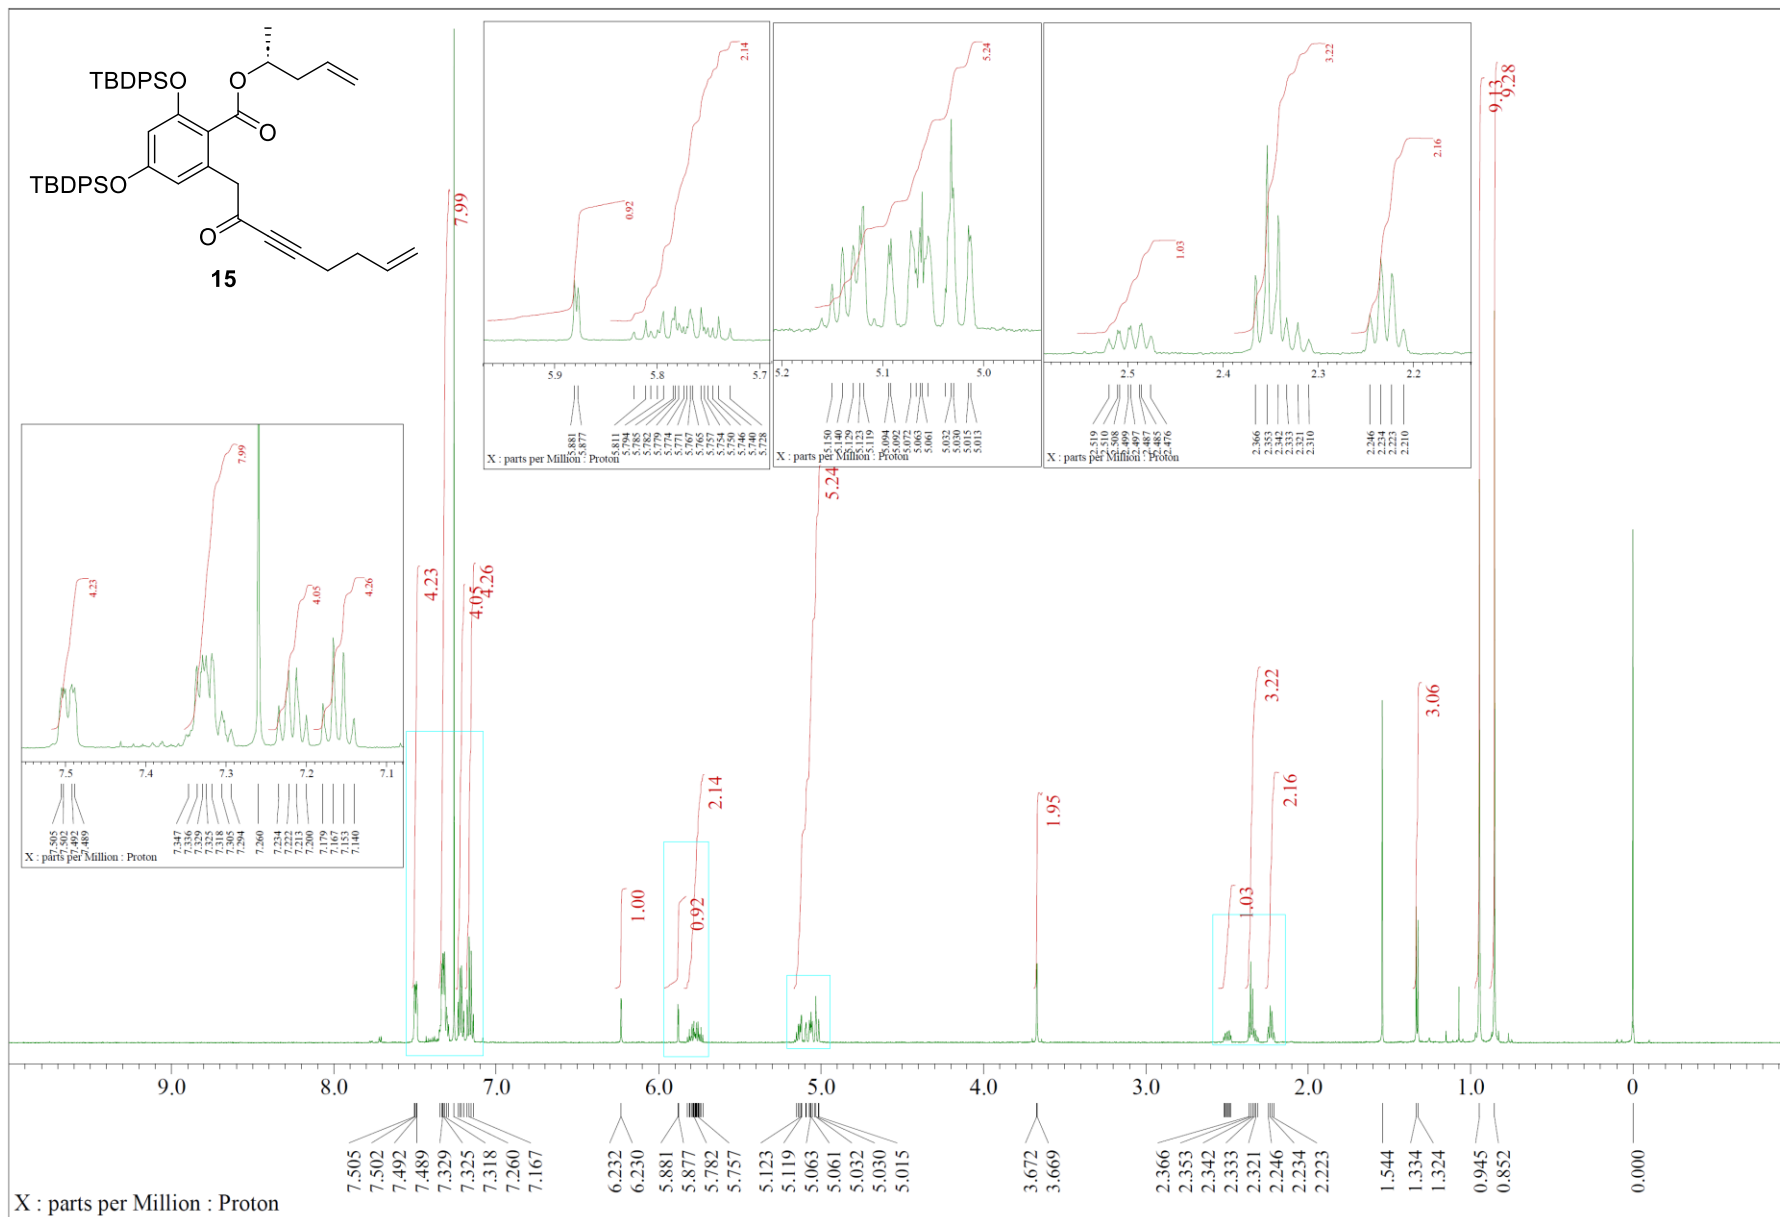

Figure S10.  $^{13}\text{C}$  NMR spectrum (150 MHz,  $\text{CDCl}_3$ ) of compound 15.

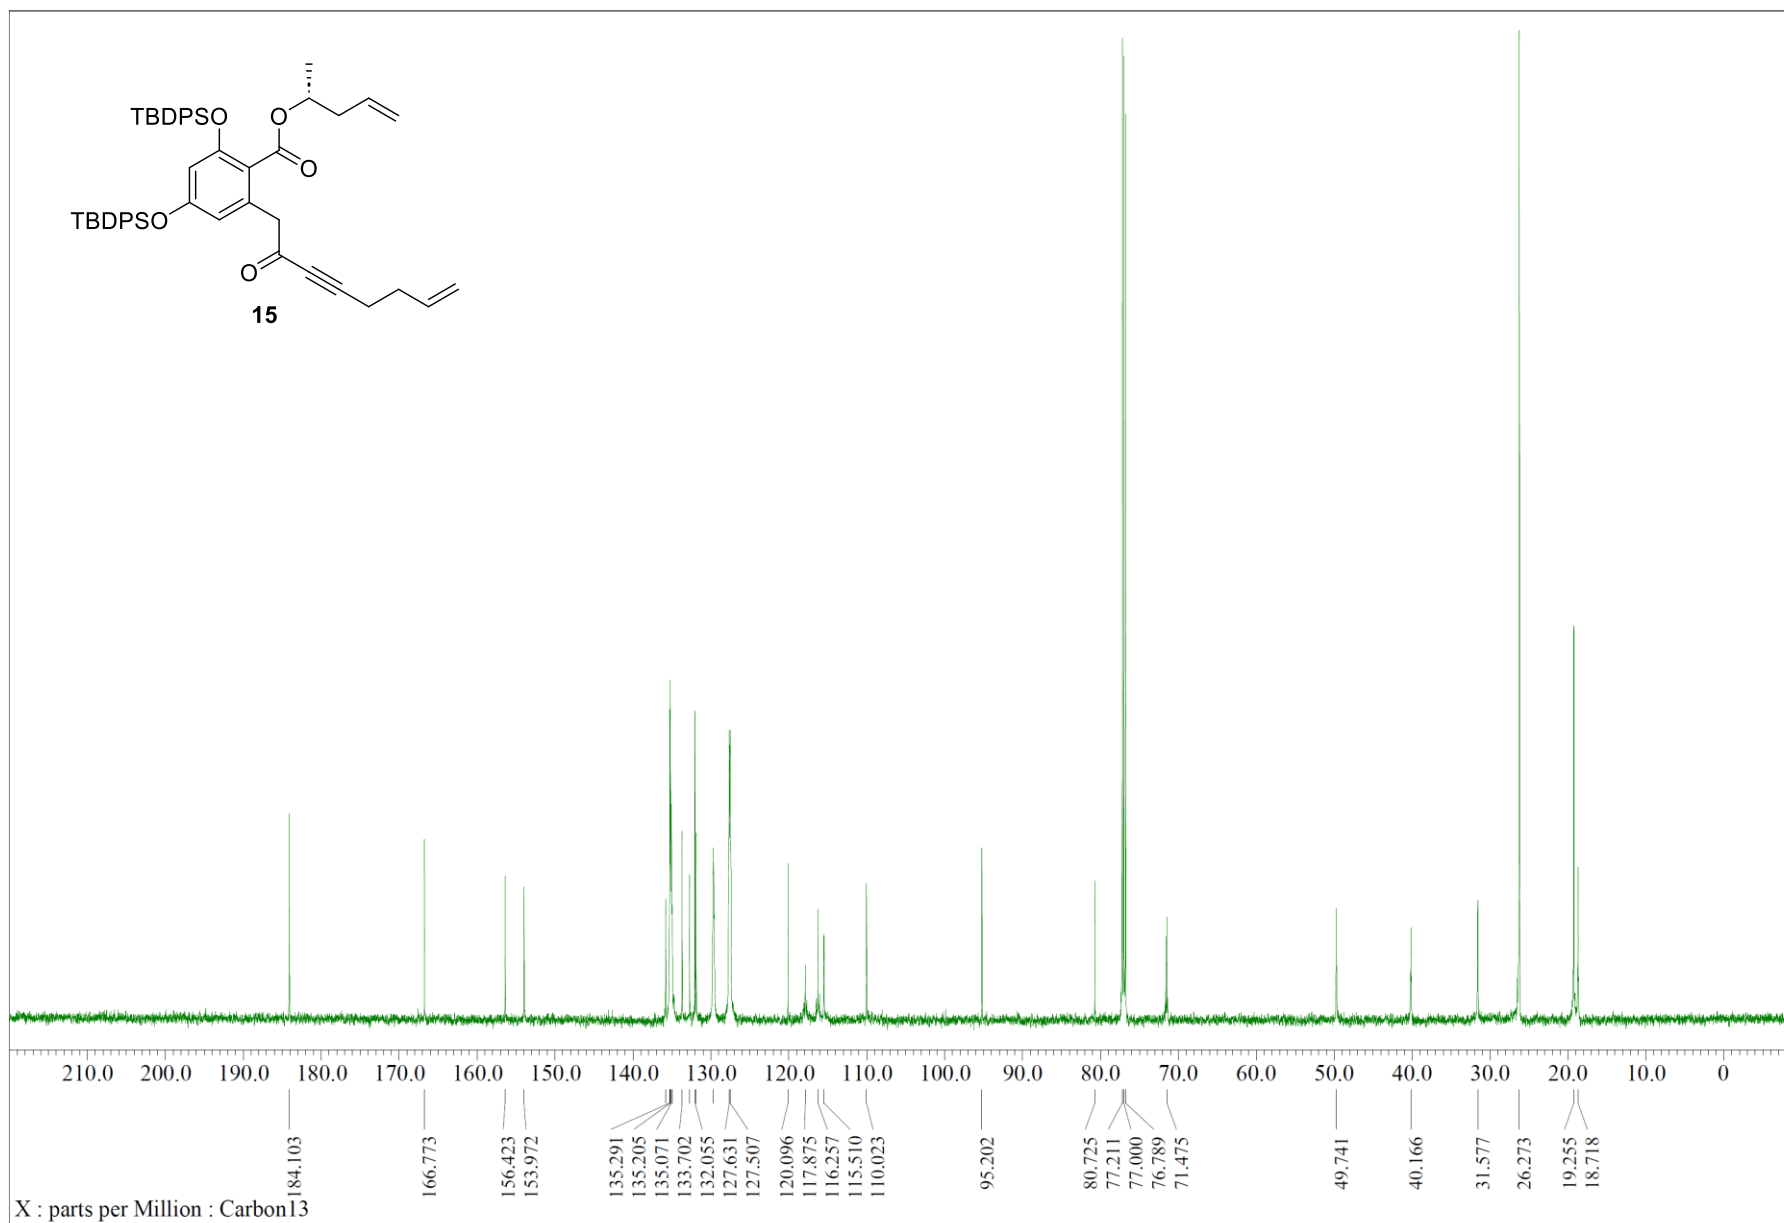

Figure S11. <sup>1</sup>H NMR spectrum (600 MHz, CDCl<sub>3</sub>) of compound (Z)-16.

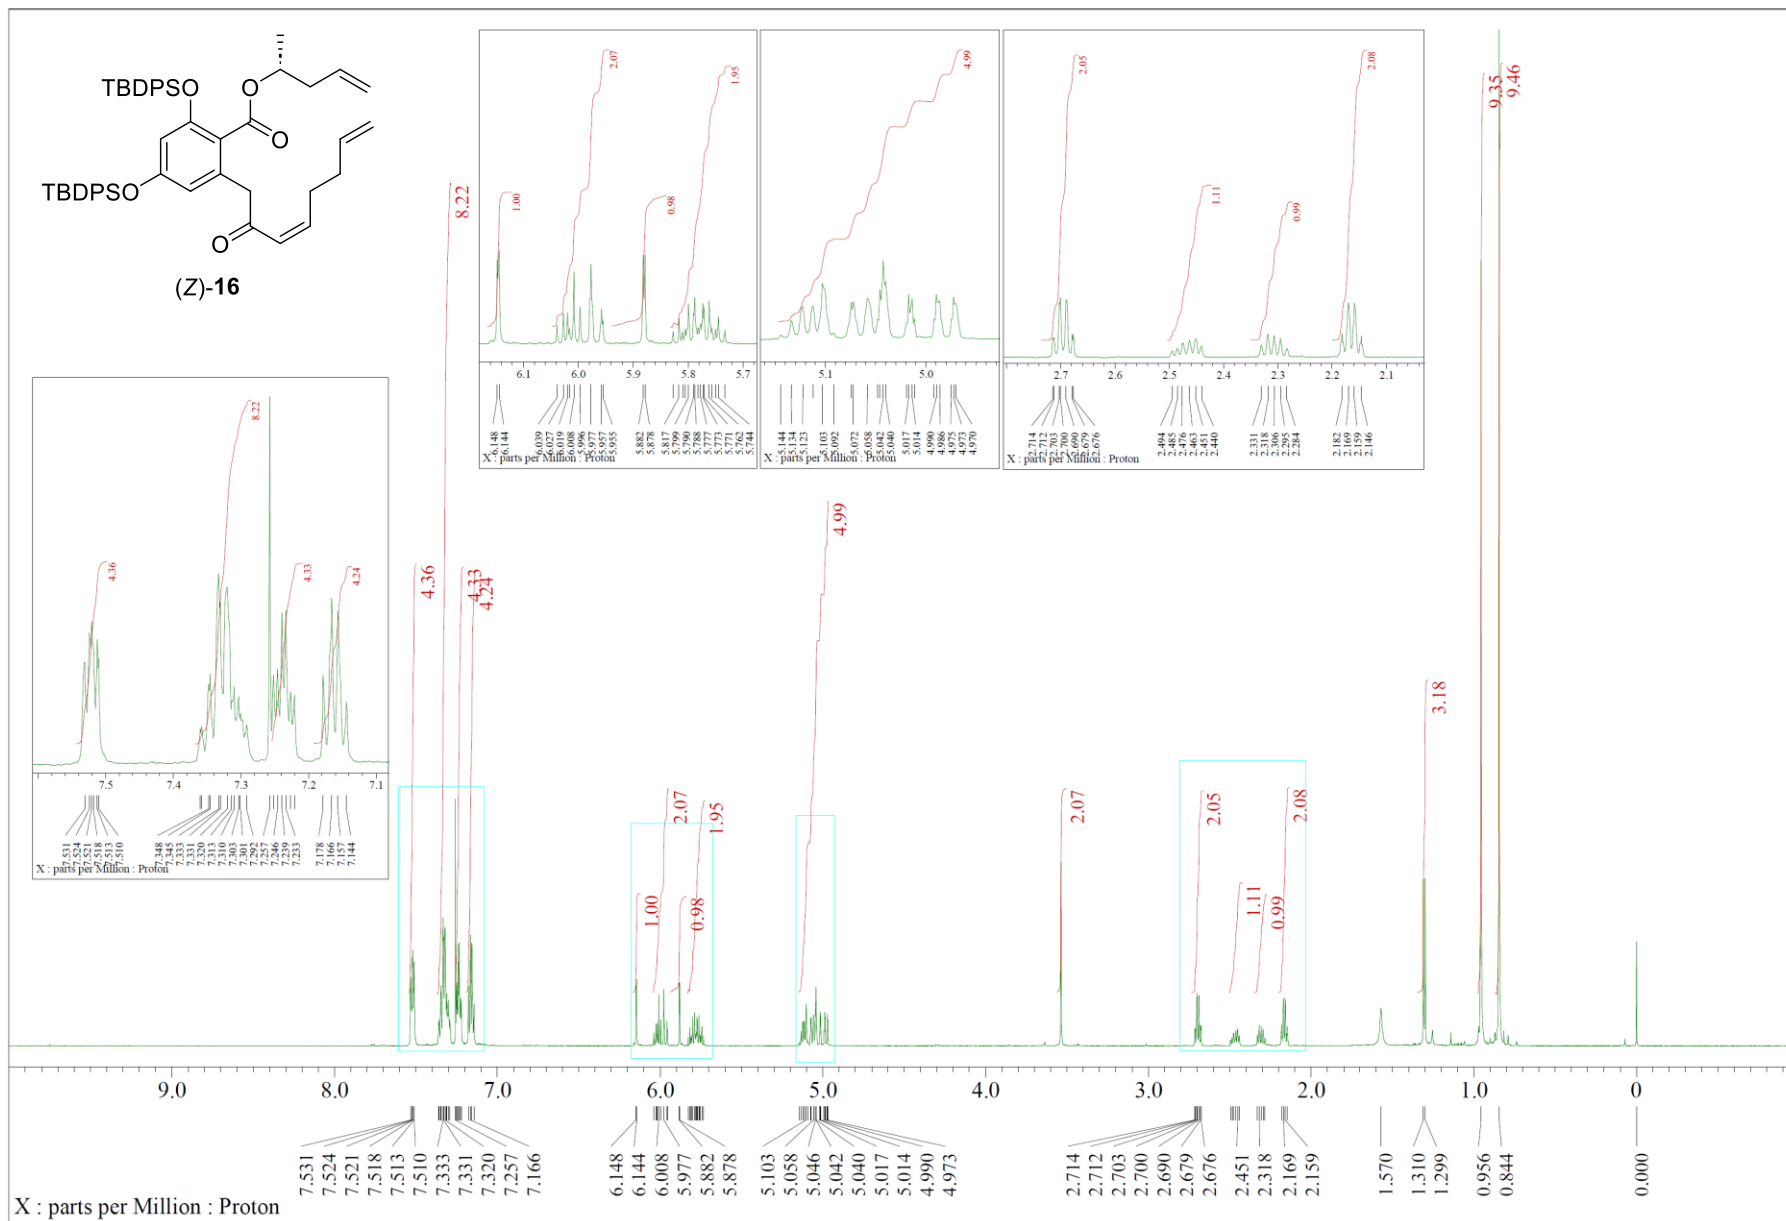

Figure S12. <sup>1</sup>H NMR spectrum (600 MHz, CDCl<sub>3</sub>) of 17.

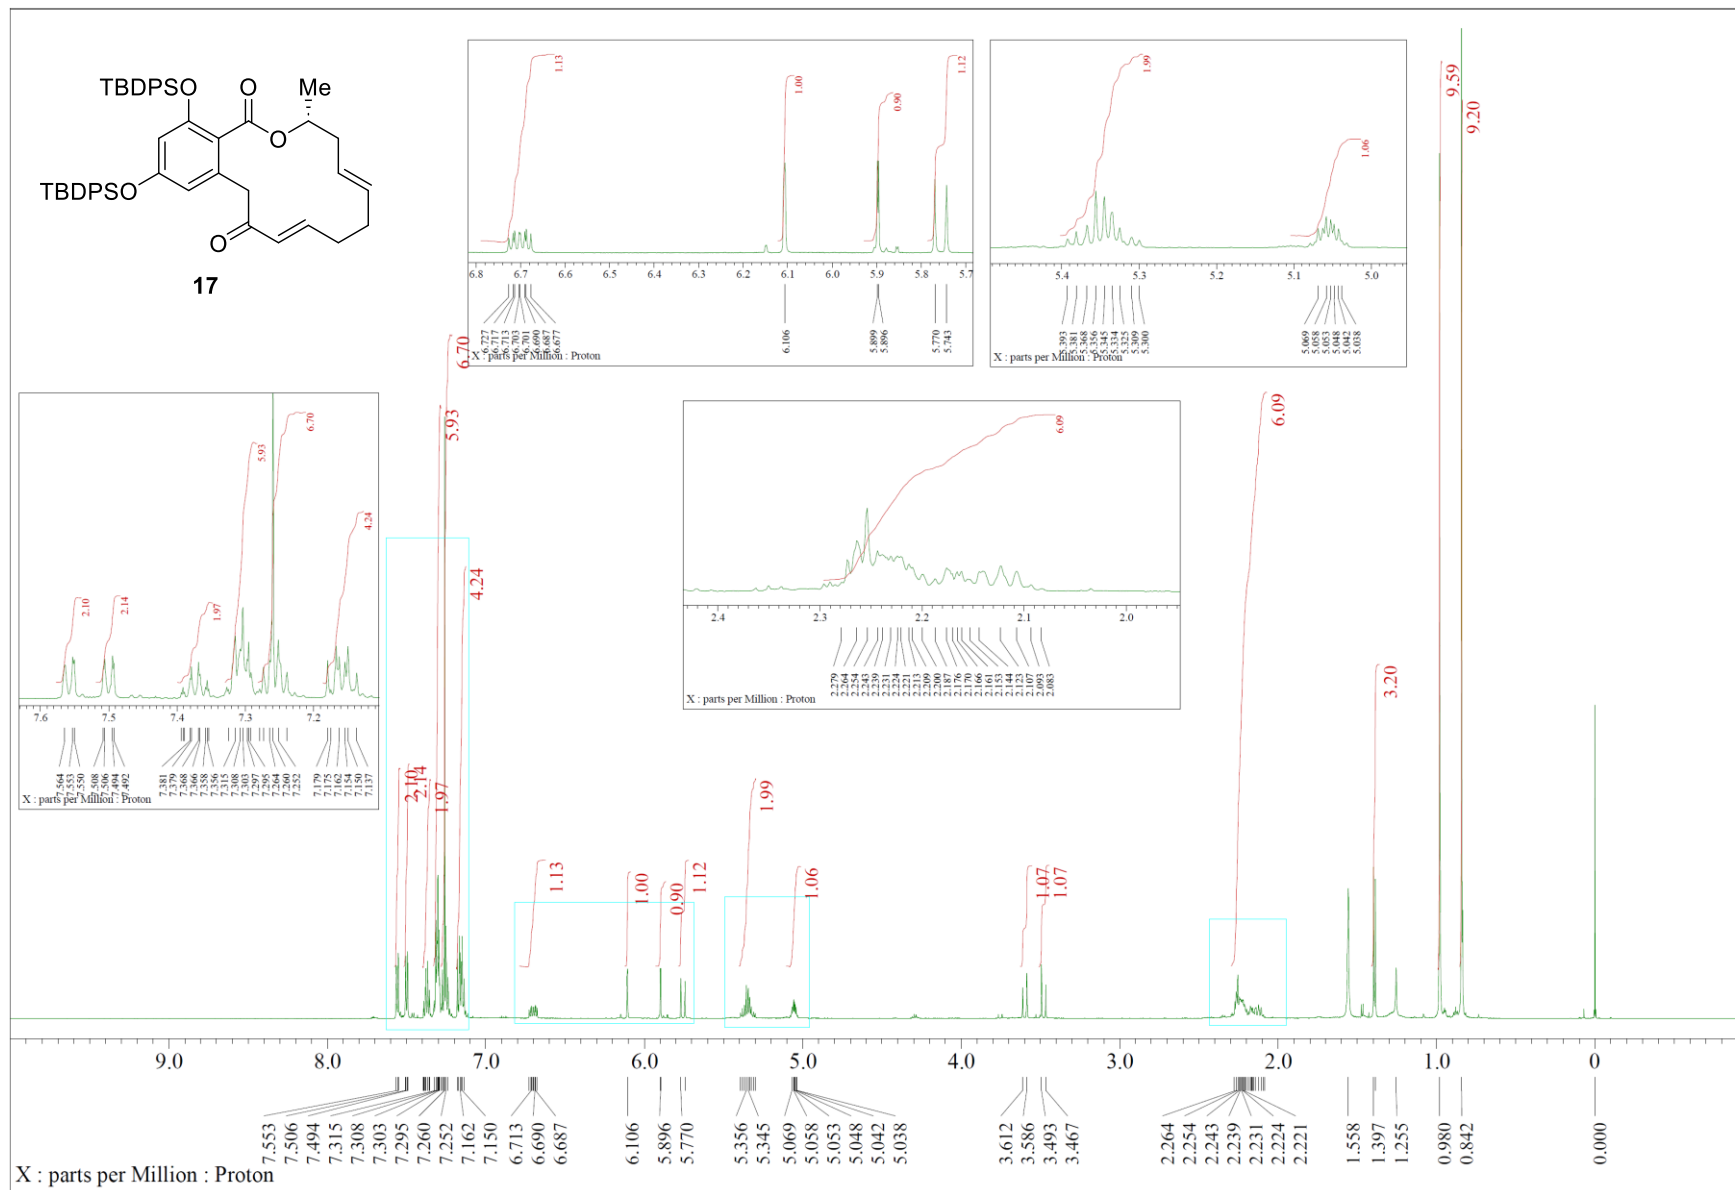

Figure S13.  $^{13}\text{C}$  NMR spectrum (150 MHz,  $\text{CDCl}_3$ ) of 17.

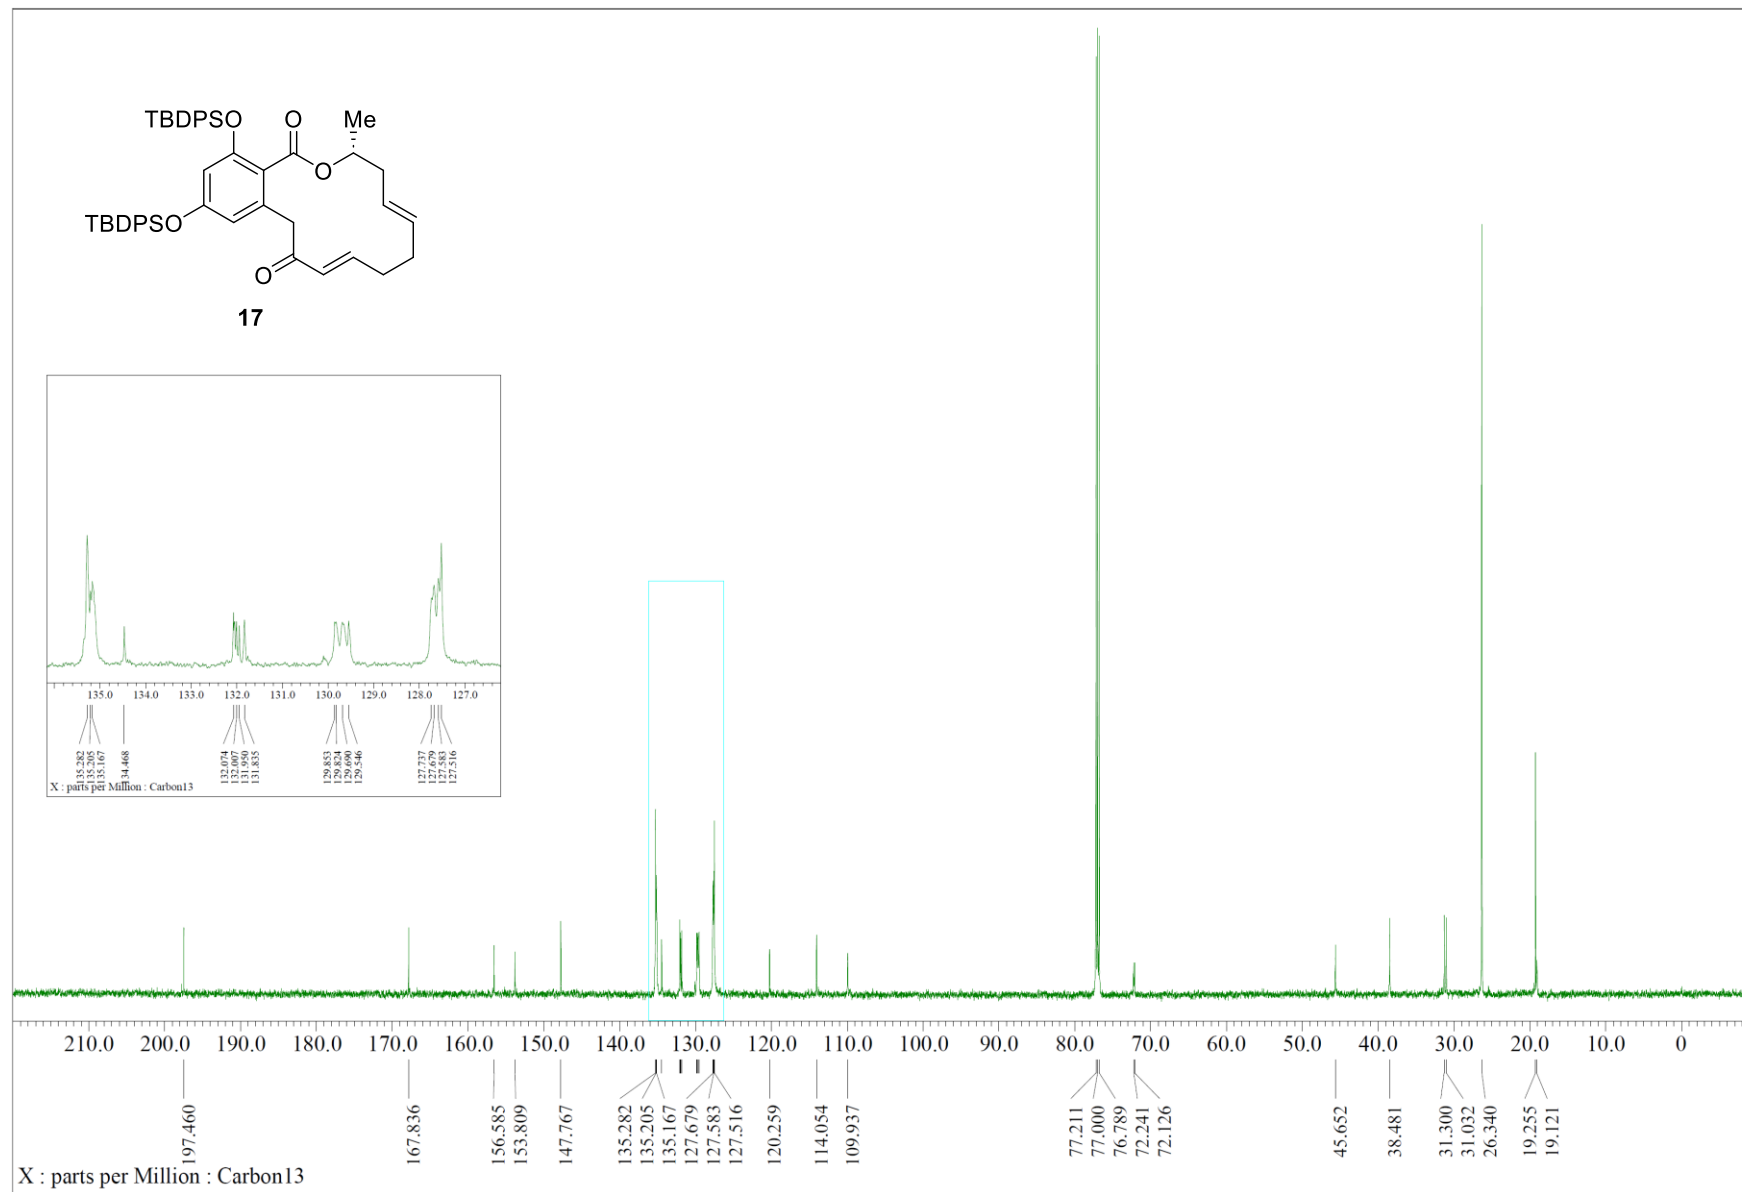

Figure S14. <sup>1</sup>H NMR spectrum (600 MHz, CD<sub>3</sub>OD) of compound 1.

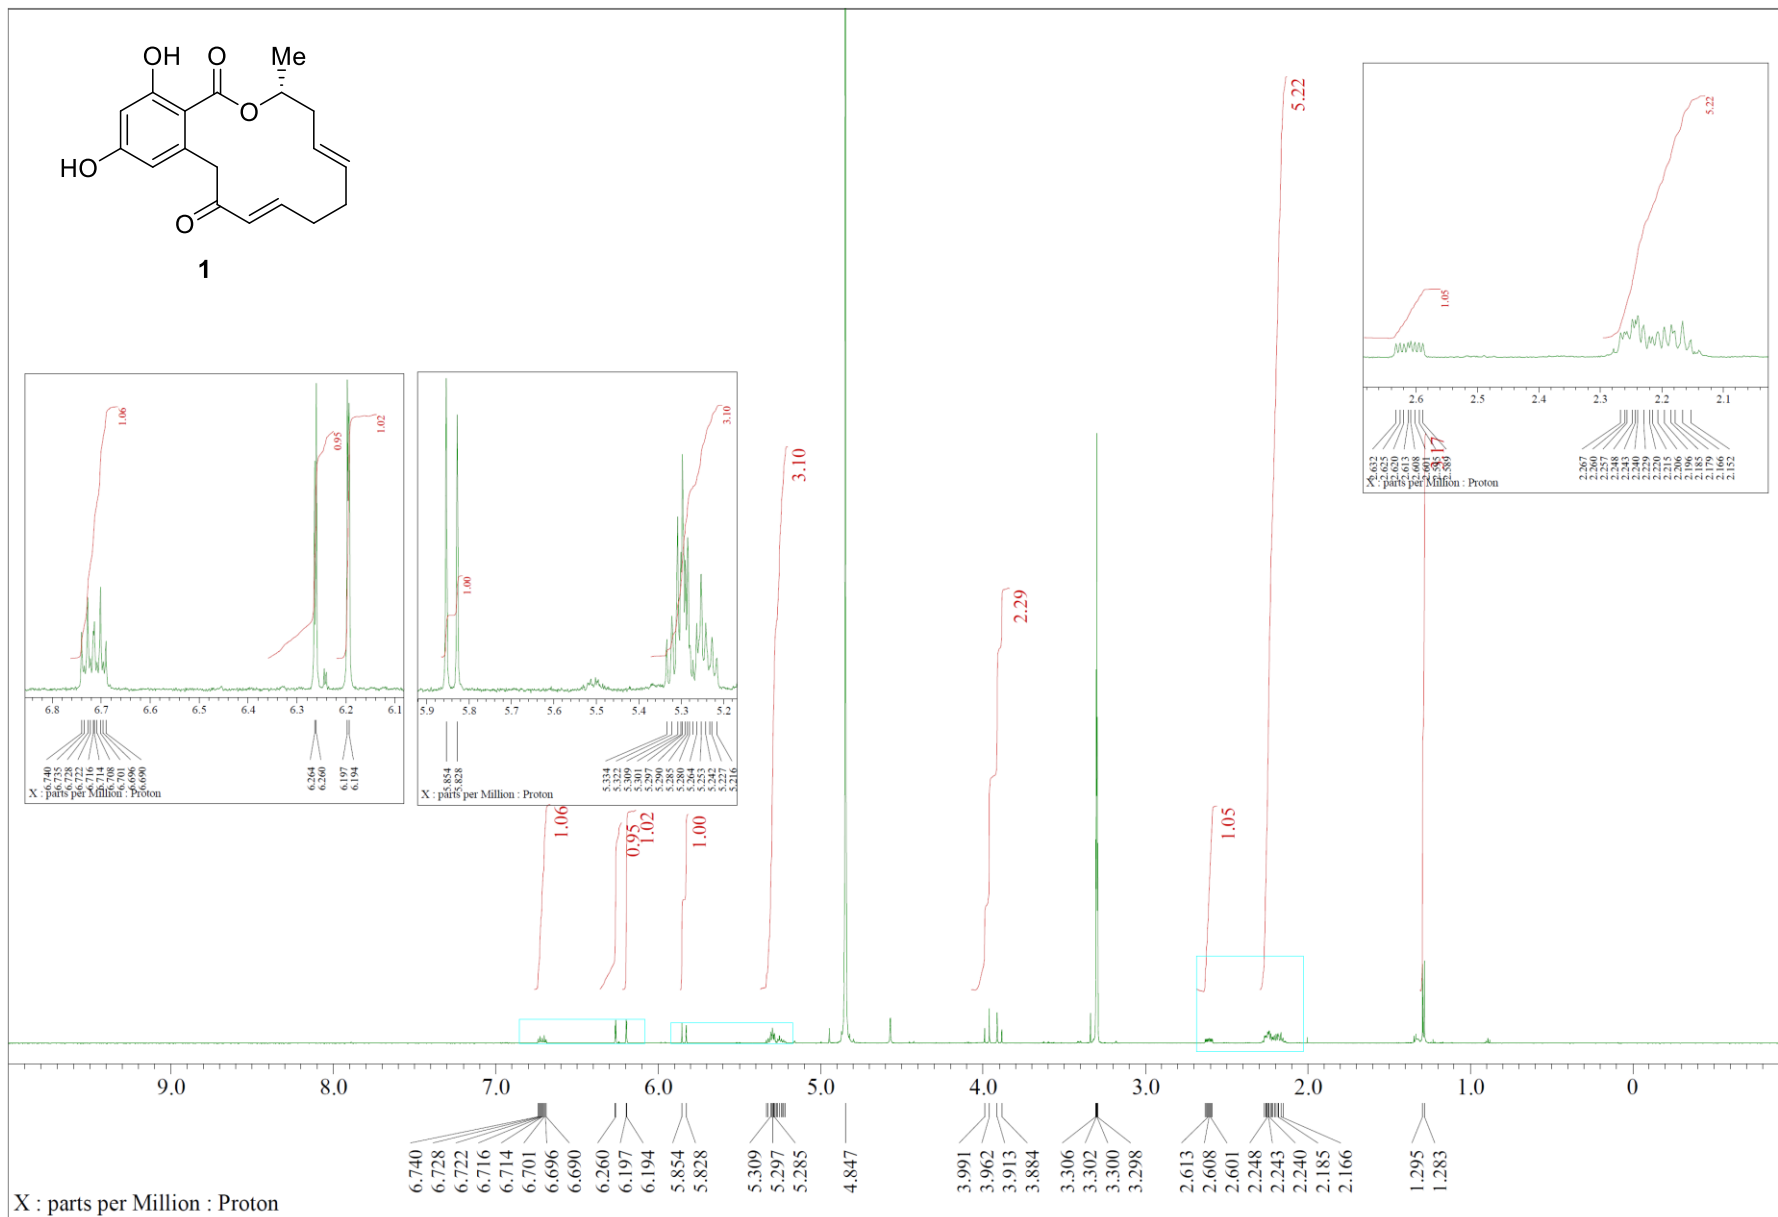



Figure S15.  $^{13}\text{C}$  NMR spectrum (150 MHz,  $\text{CD}_3\text{OD}$ ) of compound 1.

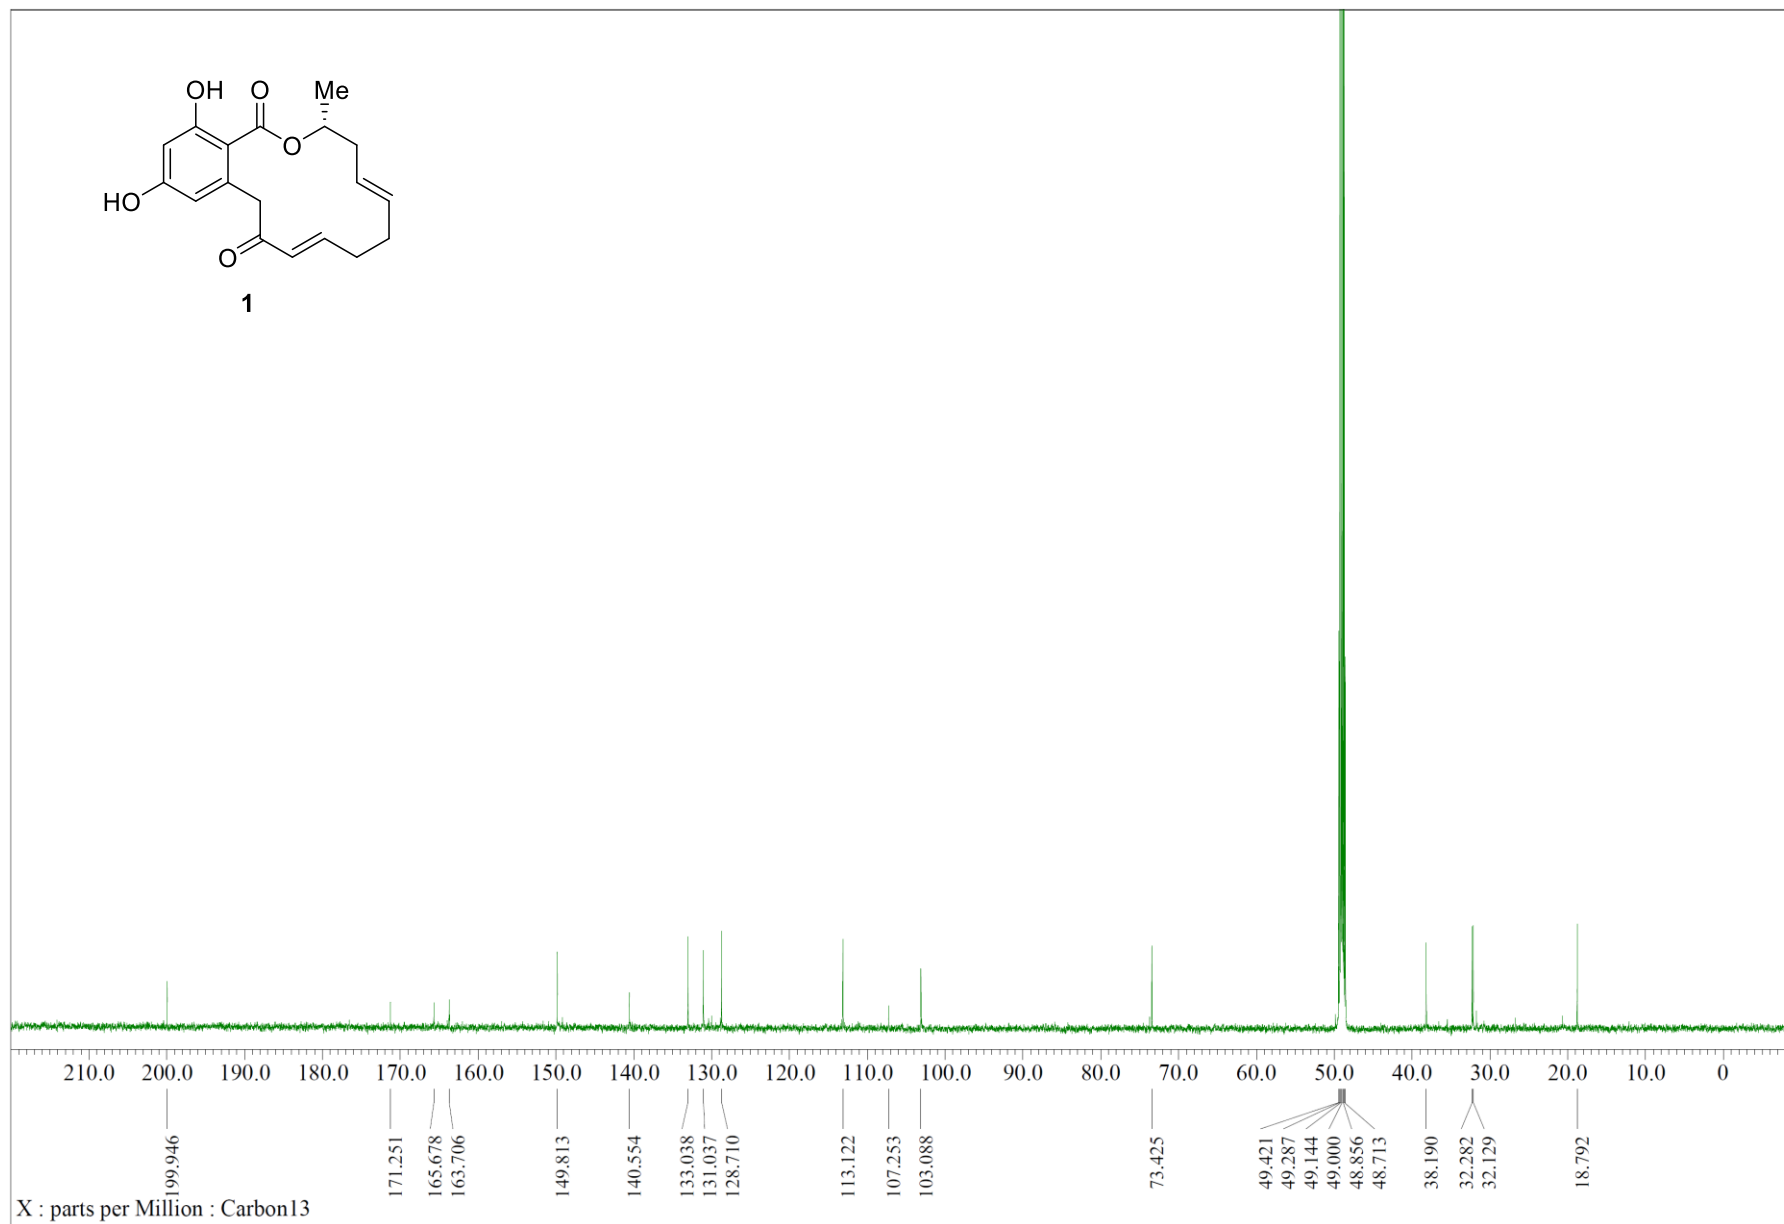

#### 4. References

S1) Wenderski, T. A.; Marsini, M. A.; Pettus, T. R. R. *Org. Lett.* **2011**, *13*, 118–121.

S2) M. J. Frisch, G. W. Trucks, H. B. Schlegel, G. E. Scuseria, M. A. Robb, J. R. Cheeseman, G. Scalmani, V. Barone, G. A. Petersson, H. Nakatsuji, X. Li, M. Caricato, A. V. Marenich, J. Bloino, B. G. Janesko, R. Gomperts, B. Mennucci, H. P. Hratchian, J. V. Ortiz, A. F. Izmaylov, J. L. Sonnenberg, D. Williams-Young, F. Ding, F. Lipparini, F. Egidi, J. Goings, B. Peng, A. Petrone, T. Henderson, D. Ranasinghe, V. G. Zakrzewski, J. Gao, N. Rega, G. Zheng, W. Liang, M. Hada, M. Ehara, K. Toyota, R. Fukuda, J. Hasegawa, M. Ishida, T. Nakajima, Y. Honda, O. Kitao, H. Nakai, T. Vreven, K. Throssell, J. A. Montgomery, Jr., J. E. Peralta, F. Ogliaro, M. J. Bearpark, J. J. Heyd, E. N. Brothers, K. N. Kudin, V. N. Staroverov, T. A. Keith, R. Kobayashi, J. Normand, K. Raghavachari, A. P. Rendell, J. C. Burant, S. S. Iyengar, J. Tomasi, M. Cossi, J. M. Millam, M. Klene, C. Adamo, R. Cammi, J. W. Ochterski, R. L. Martin, K. Morokuma, O. Farkas, J. B. Foresman, and D. J. Fox, *Gaussian 16*, Revision C.02, Gaussian, Inc., Wallingford CT, 2019.
